# Supplementary material for: Stirring the strategic direction of scuba diving marine Citizen Science: A survey of active and potential participants
Source: PubMed Central journal article supplement (PMC6095588; doi:10.1371/journal.pone.0202484), 2018-08-16
Supplement: pone.0202484.s001.pdf [file pone.0202484.s001.pdf]

**S1 Table.**

| <b>Title</b>                                                                                                                                                                                                                                                                                                                                          | <b>Location</b>            | <b>Field of research</b>                                                               | <b>Main method/contribution by scuba divers</b>                                                                |
|-------------------------------------------------------------------------------------------------------------------------------------------------------------------------------------------------------------------------------------------------------------------------------------------------------------------------------------------------------|----------------------------|----------------------------------------------------------------------------------------|----------------------------------------------------------------------------------------------------------------|
| Anderson LG, Chapman JK, Escontrela D, Gough CL. The role of conservation volunteers in the detection, monitoring and management of invasive alien lionfish. <i>Manag Biol Invasion</i> . 2017;8(4): 589-598.                                                                                                                                         | Belize                     | Lionfish monitoring                                                                    | Opportunistic and transect-based observation of species                                                        |
| Araujo G, Snow S, So CL, Labaja J, Murray R, Colucci A, et al. Population structure, residency patterns and movements of whale sharks in Southern Leyte, Philippines: results from dedicated photo-ID and citizen science. <i>Aquat Conserv</i> . 2017;27(1): 237-252.                                                                                | Philippines                | Whale shark identification and monitoring                                              | Internet-based image sharing and information                                                                   |
| Aylesworth L, Phoonsawat R, Suvanachai P, Vincent AC. Generating spatial data for marine conservation and management. <i>Biodivers Conserv</i> . 2017;26(2): 383-399.                                                                                                                                                                                 | Thailand                   | Species distribution of seahorses                                                      | Sightings information shared on database                                                                       |
| Azzurro E, Bariche M. Local knowledge and awareness on the incipient lionfish invasion in the eastern Mediterranean Sea. <i>Mar Freshw Res</i> . 2017;68(10): 1950-1954.                                                                                                                                                                              | Lebanon, Mediterranean Sea | Monitoring of lionfish invasions using local knowledge                                 | Questionnaire survey (local ecological knowledge)                                                              |
| Balistreri P, Spiga A, Deidun A, Gueroun SK, Yahia MND. Further spread of the venomous jellyfish <i>Rhopilema nomadica</i> Galil, Spanner & Ferguson, 1990 (Rhizostomeae, Rhizostomatidae) in the western Mediterranean. <i>BioInvasions Rec</i> . 2017;6(1): 19-24.                                                                                  | Western Mediterranean Sea  | Recording of alien jellyfish                                                           | Sighting of species                                                                                            |
| Bariche M, Azzurro E. Enhancing early detection through social networks: a Facebook experiment. 41 <sup>st</sup> CIESM. 2016;41: 413.                                                                                                                                                                                                                 | Lebanon, Mediterranean Sea | Monitoring of invasive marine species                                                  | Images shared on social network (Facebook)                                                                     |
| Boavida J, Assis J, Reed J, Serrão EA, Gonçalves JM. Comparison of small remotely operated vehicles and diver-operated video of circalittoral benthos. <i>Hydrobiologia</i> . 2016;766(1): 247-260.                                                                                                                                                   | Portugal                   | Benthic biodiversity assessment                                                        | Video recording along transects                                                                                |
| Branchini S, Meschini M, Covi C, Piccinetti C, Zaccanti F, Goffredo S. Participating in a citizen science monitoring program: implications for environmental education. <i>PloS One</i> . 2015;10(7): e0131812.                                                                                                                                       | Red Sea                    | Coral reef monitoring                                                                  | Questionnaire survey (ecological information)                                                                  |
| Branchini S, Pensa F, Neri P, Tonucci BM, Mattielli L, Collavo A, et al. Using a citizen science program to monitor coral reef biodiversity through space and time. <i>Biodivers Conserv</i> . 2015;24(2): 319-336.                                                                                                                                   | Red Sea                    | Coral reef monitoring                                                                  | Questionnaire survey (ecological information)                                                                  |
| Burdeno D. Expanding the rescue a reef program: assessing efficacy of citizen scientists and adding massive species. 2016. [cited 15 January 2018]. In: Internship Reports 14 [Internet]. Available from: <a href="https://scholarlyrepository.miami.edu/rsmas_intern_reports/14">https://scholarlyrepository.miami.edu/rsmas_intern_reports/14</a> . | Florida                    | Restoration of staghorn coral                                                          | Restoration outplants                                                                                          |
| Busch JA, Bardaji R, Ceccaroni L, Friedrichs A, Piera J, Simon C, et al. Citizen bio-optical observations from coast-and ocean and their compatibility with ocean colour satellite measurements. <i>Remote Sens</i> . 2016;8(11): 879.                                                                                                                | Ireland; Spain             | Monitoring of marine processes and water quality parameters using various technologies | Smartphone data collection using app, Secchi Disk, Revised Forel-Ule Scale, TrandiCam, and Do It Yourself kits |
| Carballo-Cárdenas EC, Tobi H. Citizen science regarding invasive lionfish in Dutch Caribbean                                                                                                                                                                                                                                                          | Dutch Caribbean            | Drivers and barriers to                                                                | Questionnaire survey (willingness to                                                                           |

|                                                                                                                                                                                                                                                                                                                         |                          |                                                                              |                                                                                                      |
|-------------------------------------------------------------------------------------------------------------------------------------------------------------------------------------------------------------------------------------------------------------------------------------------------------------------------|--------------------------|------------------------------------------------------------------------------|------------------------------------------------------------------------------------------------------|
| MPAs: drivers and barriers to participation. <i>Ocean Coast Manage.</i> 2016;133: 114-127.                                                                                                                                                                                                                              |                          | participation in lionfish invasion control                                   | detect species and remove species)                                                                   |
| Castilla AM, Riera R, Humaid MA, Garland Jr T, Alkuwari A, Muzaffar S, et al. Contribution of citizen science to improve knowledge on marine biodiversity in the Gulf Region. <i>J Assn Arab Univ Basic Appl Sci.</i> 2017;24: 126-135.                                                                                 | Qatar and Gulf Region    | Sea snake identification and distribution                                    | Interviews (ecological information)                                                                  |
| Cerrano C, Milanese M, Ponti M. Diving for science-science for diving: volunteer scuba divers support science and conservation in the Mediterranean Sea. <i>Aquat Conserv.</i> 2017;27(2): 303-323.                                                                                                                     | Italy, Mediterranean Sea | Environmental monitoring, monitoring of bottom habitats                      | Observation of presence/absence and abundance of taxa, environmental information from dive computers |
| Chatzigeorgiou G, Faulwetter S, Dailianis T, Smith VS, Koulouri P, Dounas C, et al. Testing the robustness of Citizen Science projects: evaluating the results of pilot project COMBER. <i>Biodivers Data J.</i> 2016;4: e10859.                                                                                        | Aegean Sea               | Marine biodiversity monitoring                                               | Observation of presence/absence and abundance of taxa                                                |
| Cialoni D, Pieri M, Balestra C, Marroni A. Dive risk factors, gas bubble formation, and decompression illness in recreational SCUBA diving: analysis of DAN Europe DSL data base. <i>Front Psychol.</i> 2017;8: 1587. doi: 10.3389/fpsyg.2017.01587.                                                                    | Europe                   | Retrospective analysis of physiological monitoring of scuba divers           | Dive computer data and passive participation (ecodoppler)                                            |
| Cigliano JA, Ballard HL. <i>Citizen science for coastal and marine conservation.</i> 2017. Abingdon: Routledge.                                                                                                                                                                                                         | NA                       | Marine conservation                                                          | Mixed methods                                                                                        |
| Cigliano JA, Meyer R, Ballard HL, Freitag A, Phillips TB, Wasser A. Making marine and coastal citizen science matter. <i>Ocean Coast Manage.</i> 2015;115: 77-87.                                                                                                                                                       | Belize; California       | Gastropod mollusk monitoring, marine protected area monitoring, conservation | Metrics measurement of species along transects, baselines for MPA monitoring, MPA monitoring         |
| Clauson-Kaas S, Richardson K, Rahbek C, Holt BG. Species-specific environmental preferences associated with a hump-shaped diversity/temperature relationship across tropical marine fish assemblages. <i>J Biogeogr.</i> 2017;44(10): 2343-2353.                                                                        | Caribbean                | Fish species richness in relation to environmental parameters                | Observation and identification of species                                                            |
| Couturier LI, Jaine FR, Kashiwagi T. First photographic records of the giant manta ray <i>Manta birostris</i> off eastern Australia. <i>PeerJ.</i> 2015;3: e742.                                                                                                                                                        | Eastern Australia        | Manta ray identification and monitoring                                      | Shared photographs and video recordings                                                              |
| Crocetta F, Gofas S, Salas C, Tringali LP, Zenetos A. Local ecological knowledge versus published literature: a review of non-indigenous Mollusca in Greek marine waters. <i>Aquat Invasions.</i> 2017;12(4): 415-434.                                                                                                  | Greece                   | Non-indigenous mollusk inventory                                             | Images shared online with additional information                                                     |
| D'Alelio D, Luongo G, Di Capua I. Plankton food for benthic fish: de visu evidence of trophic interaction between rainbow wrasse ( <i>Coris julis</i> ) and pelagic tunicates ( <i>Pegea confoederata</i> ). <i>AIOL.</i> 2017;8(2): 235-241.                                                                           | Italy                    | Trophic interaction and monitoring of salps                                  | Observation of species and photographic frames                                                       |
| Dailianis T, Akyol O, Babali N, Bariche M, Crocetta F, Gerovasileiou V, et al. New Mediterranean biodiversity records. <i>Mediterr Mar Sci.</i> 2016;17(2): 608-626.                                                                                                                                                    | Mediterranean Sea        | New biodiversity records                                                     | Observations, shared photos, videos and specimens                                                    |
| Deidun A, Sciberras J, Sciberras A, Gauci A, Balistreri P, Salvatore A, et al. The first record of the white-spotted Australian jellyfish <i>Phyllorhiza punctata</i> von Lendenfeld, 1884 from Maltese waters (western Mediterranean) and from the Ionian coast of Italy. <i>BioInvasions Rec.</i> 2017;6(2): 119-124. | Malta; Ionian Sea, Italy | Recording of alien jellyfish species                                         | Species sightings shared on online platform                                                          |
| Di Camillo CG, Ponti M, Bavestrello G, Krzelj M, Cerrano C. Building a baseline for habitat-                                                                                                                                                                                                                            | Central-Eastern          | Mapping distribution of                                                      | Shared videos and additional information,                                                            |

|                                                                                                                                                                                                                                                                             |                                             |                                                     |                                                                                                                                                                          |
|-----------------------------------------------------------------------------------------------------------------------------------------------------------------------------------------------------------------------------------------------------------------------------|---------------------------------------------|-----------------------------------------------------|--------------------------------------------------------------------------------------------------------------------------------------------------------------------------|
| forming corals by a multi-source approach, including Web Ecological Knowledge. <i>Biodivers Conserv.</i> 2017;doi: 10.1007/s10531-017-1492-8.                                                                                                                               | Mediterranean Sea                           | habitat-forming corals                              | information from observation of presence/absence and abundance of taxa                                                                                                   |
| Edgar GJ, Stuart-Smith RD, Cooper A, Jacques M, Valentine J. New opportunities for conservation of handfishes (Family Brachionichthyidae) and other inconspicuous and threatened marine species through citizen science. <i>Biol Conserv.</i> 2017;208: 174-182.            | Australia                                   | Handfish monitoring                                 | Observation of species abundance and size along transects, photoquadrats                                                                                                 |
| Forrester G, Baily P, Conetta D, Forrester L, Kintzing E, Jarecki L. Comparing monitoring data collected by volunteers and professionals shows that citizen scientists can detect long-term change on coral reefs. <i>J Nat Conserv.</i> 2015;24: 1-9.                      | British Virgin Islands                      | Coral reef monitoring                               | Observation of species abundance and cover along transects                                                                                                               |
| Gerovasileiou V, Akel EHKh, Akyol O, Alongi G, Azevedo F, Babali N, et al. New Mediterranean Biodiversity Records (July, 2017). <i>Mediterr Mar Sci</i> 2017;18(2): 355-384.                                                                                                | Mediterranean Sea                           | New biodiversity records                            | Observations and shared photos                                                                                                                                           |
| Gerovasileiou V, Chintiroglou C, Vafidis D, Koutsoubas D, Sini M, Dailianis T, et al. Census of biodiversity in marine caves of the Eastern Mediterranean Sea. <i>Mediterr Mar Sci.</i> 2015;16(1): 245-265.                                                                | Mediterranean Sea                           | Census of species in caves                          | Qualitative information through web for a and direct communications                                                                                                      |
| Gerovasileiou V, Dailianis T, Panteri E, Michalakis N, Gatti G, Sini M, et al. CIGESMED for divers: Establishing a citizen science initiative for the mapping and monitoring of coralligenous assemblages in the Mediterranean Sea. <i>Biodivers Data J.</i> 2016;4: e8692. | Mediterranean Sea                           | Mapping and monitoring of coralligenous assemblages | Environmental data from dive computers and additional information, observation of species and their abundance, observation of threats, all uploaded onto online platform |
| Gerovasileiou V, Voultziadou E, Issaris Y, Zenetos A. Alien biodiversity in Mediterranean marine caves. <i>Mar Ecol.</i> 2016;37(2): 239-256.                                                                                                                               | Mediterranean Sea                           | Information on alien species in caves               | Information (ecological information) shared personally or through web                                                                                                    |
| Giusti M, Cerrano C, Angiolillo M, Tunesi L, Canese S. An updated overview of the geographic and bathymetric distribution of <i>Savalia savaglia</i> . <i>Mediterr Mar Sci.</i> 2015;16(1): 128-135.                                                                        | Mediterranean Sea                           | Gold coral mapping                                  | Observation of species                                                                                                                                                   |
| Hesley D, Burdeno D, Drury C, Schopmeyer S, Lirman D. Citizen science benefits coral reef restoration activities. <i>J Nat Conserv.</i> 2017;40: 94-99.                                                                                                                     | Florida                                     | Reef restoration                                    | Restoration outplants                                                                                                                                                    |
| Hylton S, White WT, Chin A. The sharks and rays of the Solomon Islands: a synthesis of their biological diversity, values and conservation status. <i>Pac Conserv Biol.</i> 2018;23(4): 324-334.                                                                            | Solomon Islands                             | Shark species checklist                             | Shared photographic or other evidence of species                                                                                                                         |
| Kienberger K, Prieto L. The jellyfish <i>Rhizostoma luteum</i> (Quoy & Gaimard, 1827): not such a rare species after all. <i>Mar Biodivers.</i> 2017;doi: 10.1007/s12526-017-0637-z.                                                                                        | Northeastern Atlantic Ocean and Alboran Sea | Historical distribution of jellyfish                | Sightings of species, shared photos and videos through online platforms                                                                                                  |
| Kittinger JN, Bambico TM, Minton D, Miller A, Mejia M, Kalei N, et al. Restoring ecosystems, restoring community: socioeconomic and cultural dimensions of a community-based coral reef restoration project. <i>Reg Environ Change.</i> 2016;16(2): 301-313.                | O'ahu                                       | Coral reef restoration                              | Interview (acceptance of restoration)                                                                                                                                    |
| Lamine EB, Di Franco A, Romdhane MS, Francour P. Can citizen science contribute to fish assemblages monitoring in understudied areas? The case study of Tunisian marine protected areas. <i>Estuar Coast Shelf S.</i> 2018;200: 420-427.                                    | Tunisia                                     | Fish assemblages monitoring                         | Observation of presence/absence of species, observation of species density and size along transects                                                                      |
| Loerzel JL, Goedeke TL, Dillard MK, Brown G. SCUBA divers above the waterline: using participatory mapping of coral reef conditions to inform reef management. <i>Mar Policy.</i>                                                                                           | US Virgin Islands                           | Mapping of reef habitats, marine protected area     | Mapping of reef conditions, uses and threats using Google maps interface                                                                                                 |

|                                                                                                                                                                                                                                                                                      |                         |                                                        |                                                                                                                    |
|--------------------------------------------------------------------------------------------------------------------------------------------------------------------------------------------------------------------------------------------------------------------------------------|-------------------------|--------------------------------------------------------|--------------------------------------------------------------------------------------------------------------------|
| 2017;76: 79-89.                                                                                                                                                                                                                                                                      |                         | monitoring                                             |                                                                                                                    |
| Loh TL, Tewfik A, Aylesworth L, Phoonsawat R. Species in wildlife trade: socio-economic factors influence seahorse relative abundance in Thailand. <i>Biol Conserv.</i> 2016;201: 301-308.                                                                                           | Thailand                | Seahorse monitoring                                    | Observation and metrics (sex, height, reproductive state) of species                                               |
| Long SL, Azmi NA. Using photographic identification to monitor sea turtle populations at Perhentian Islands Marine Park in Malaysia. <i>Herpetol Conserv Biol.</i> 2017;12(2): 350-366.                                                                                              | Malaysia                | Turtle monitoring using photos                         | Shared images online and via email, with additional information                                                    |
| Malpica-Cruz L, Chaves LC, Côté IM. Managing marine invasive species through public participation: Lionfish derbies as a case study. <i>Mar Policy.</i> 2016;74: 158-164.                                                                                                            | Western Atlantic Ocean  | Lionfish invasion control                              | Derbies                                                                                                            |
| Maňko, M. K., A. Weydmann, and G. M. Mapstone. 2017. A shallow-living benthic Rhodaliid siphonophore: citizen science discovery from Papua New Guinea. <i>Zootaxa.</i> 2017;4324(1): 189-194.                                                                                        | Papua New Guinea        | Siphonophores recording                                | Shared images via social network (Facebook)                                                                        |
| Martin VY. Citizen Science as a means for increasing public engagement in science: presumption or possibility?. <i>Sci Commun.</i> 2017;39(2): 142-168.                                                                                                                              | Australia               | Broad interest in MCS, marine species monitoring       | Questionnaire survey (willingness to participate in sightings sharing)                                             |
| Martin VY, Christidis L, Lloyd DJ, Pecl GT. Understanding drivers, barriers and information sources for public participation in marine citizen science. <i>J Sci Commun.</i> 2016;15(2): 1-19.                                                                                       | Australia               | Marine species monitoring                              | Sightings of species shared through online platform                                                                |
| Martin VY, Christidis L, Pecl GT. Public interest in marine citizen science: is there potential for growth?. <i>Bioscience.</i> 2016;66(8): 683-692.                                                                                                                                 | Australia               | Broad interest in MCS, marine species monitoring       | Questionnaire survey (willingness to participate in sightings sharing)                                             |
| Martin VY, Smith L, Bowling A, Christidis L, Lloyd D, Pecl GT. Citizens as scientists: what influences public contributions to marine research?. <i>Sci Commun.</i> 2016;38(4): 495-522.                                                                                             | Australia               | Broad interest in MCS, marine species monitoring       | Questionnaire survey (willingness to participate in sightings sharing)                                             |
| Mehrotra R, Scott CM. Species inventory of sea slugs (Gastropoda: Heterobranchia) for Koh Tao, Thailand, with 25 first records for Thai waters. <i>Mar Biodivers.</i> 2016;46(4): 761-771.                                                                                           | Thailand                | Sea slug inventory using images                        | Images shared through social media or personal interviews, roving belt surveys                                     |
| Meyers EK, Tuya F, Barker J, Jiménez Alvarado D, Castro-Hernández JJ, Haroun R, et al. Population structure, distribution and habitat use of the Critically Endangered Angelshark, <i>Squatina squatina</i> , in the Canary Islands. <i>Aquat Conserv.</i> 2017;27(6): 1133-1144.    | Canary Islands, Spain   | Angelshark identification and monitoring               | Location and information (environmental and ecological) of encounters with species, shared through online platform |
| Mieras PA, Harvey-Clark C, Bear M, Hodgins G, Hodgins B. The economy of shark conservation in the Northeast Pacific: the role of ecotourism and Citizen Science. <i>Adv Mar Biol.</i> 2017;78: 121-153.                                                                              | Northeast Pacific Ocean | Shark monitoring                                       | Sighting and identification of species                                                                             |
| Miyazaki Y, Murase A, Senou H. A natural history museum as a platform for accumulating verifiable information on non-native fishes: a Japanese example. <i>Manag Biol Invasion.</i> 2015;6(1): 105-110.                                                                              | Japan                   | Alien species information through images and specimens | Shared images and specimens                                                                                        |
| Miyazaki Y, Murase A, Shiina M, Masui R, Senou H. Integrating and utilizing citizen biodiversity data on the Web for science: an example of a rare triggerfish hybrid image provided by a sport fisherman. <i>J Coast Res.</i> 2015;31(4): 1035-1039.                                | Japan                   | Biodiversity information through images shared online  | Shared images                                                                                                      |
| Morris DJ, Pinnegar JK, Maxwell DL, Dye SR, Fernand LJ, Flatman S, et al. Over 10 million seawater temperature records for the United Kingdom Continental Shelf between 1880 and 2014 from 17 Cefas (United Kingdom government) marine data systems. <i>ESSD.</i> 2018;10(1): 27-51. | UK                      | Seawater temperature monitoring                        | Data from dive computers                                                                                           |
| Mytilineou Ch, Akel EHKh, Babali N, Balistreri P, Bariche M, Boyaci YÖ, et al. New Mediterranean Biodiversity Records (November, 2016). <i>Mediterr Mar Sci.</i> 2016;17: 794-821.                                                                                                   | Mediterranean Sea       | New biodiversity records                               | Observations, shared photos, videos and specimens                                                                  |

|                                                                                                                                                                                                                                                                |                                  |                                                                                        |                                                                                                                                                                            |
|----------------------------------------------------------------------------------------------------------------------------------------------------------------------------------------------------------------------------------------------------------------|----------------------------------|----------------------------------------------------------------------------------------|----------------------------------------------------------------------------------------------------------------------------------------------------------------------------|
| Nazimi L, Robbins WD, Schilds A, Huvencers C. Comparison of industry-based data to monitor white shark cage-dive tourism. <i>Tourism Manage.</i> 2018;66: 263-273.                                                                                             | South Australia                  | Identification of sharks during cage diving                                            | Shared images                                                                                                                                                              |
| Nimbs MJ, Larkin M, Davis TR, Harasti D, Willan RC, Smith SD. Southern range extensions for twelve heterobranch sea slugs (Gastropoda: Heterobranchia) on the eastern coast of Australia. <i>Mar Biodivers Rec.</i> 2016;9(1): 27.                             | Eastern Australia                | Monitoring sea slugs geographic extension                                              | Sightings and observation of species, shared images                                                                                                                        |
| Ormond R, Gore M, Bladon A, Dubock O, Kohler J, Millar C. Protecting Cayman Island sharks: monitoring, movement and motive. 69 <sup>th</sup> GCFI. 2016;69: 14-27.                                                                                             | Cayman Islands                   | Shark monitoring                                                                       | Observation of presence/absence of species and information (tags), shared online using platform                                                                            |
| Özbek EÖ, Mavruk S, Saygu İ, Öztürk B. Lionfish distribution in the eastern Mediterranean coast of Turkey. <i>J Black Sea/Medit Environ.</i> 2017;23(1): 1-16.                                                                                                 | Mediterranean coast of Turkey    | Lionfish monitoring                                                                    | Sightings reported on the social networks                                                                                                                                  |
| Parkinson JE, Yang SY, Kawamura I, Byron G, Todd PA, Reimer JD. 2016. A citizen science approach to monitoring bleaching in the zoantharian <i>Palythoa tuberculosa</i> . <i>PeerJ.</i> 2016;4: e1815.                                                         | Japan                            | Monitoring bleaching of zoantharians                                                   | Colour assessment                                                                                                                                                          |
| Pikesley SK, Godley BJ, Latham H, Richardson PB, Robson LM, Solandt JL, et al. Pink sea fans ( <i>Eunicella verrucosa</i> ) as indicators of the spatial efficacy of Marine Protected Areas in southwest UK coastal waters. <i>Mar Policy.</i> 2016;64: 38-45. | Southwest UK                     | Monitoring of marine protected area using indicator species                            | Observation of abundance and metrics of species                                                                                                                            |
| Pittman SJ, Poti M, Jeffrey CF, Kracker LM, Mabrouk A. Decision support framework for the prioritization of coral reefs in the US Virgin Islands. <i>Ecol Inform.</i> 2017;doi: 10.1016/j.ecoinf.2017.09.008.                                                  | US Virgin Islands                | Map-based decision-support tool using local ecological knowledge                       | Local ecological knowledge, participatory mapping tool in Google maps                                                                                                      |
| Ragkousis M, Marmara D, Filiz H, Uyan U, Tuncer S, Romanidis-Kyriakidis G, et al. The northward expansion of <i>Synaptula reciprocans</i> (Echinodermata) in the Mediterranean Sea. <i>J Black Sea/Medit Environ.</i> 2017;23(3): 209-215.                     | Eastern Mediterranean Sea        | Alien marine species monitoring                                                        | Images shared using online platform with additional information                                                                                                            |
| Raoult V, David PA, Dupont SF, Mathewson CP, O'Neill SJ, Powell NN, et al. GoPros™ as an underwater photogrammetry tool for citizen science. <i>PeerJ.</i> 2016;4: e1960.                                                                                      | Great Barrier Reef, Australia    | Coral reef habitat mapping using photogrammetry                                        | GoPro photogrammetry                                                                                                                                                       |
| Roberts M, Hanley N, Williams S, Cresswell W. Terrestrial degradation impacts on coral reef health: evidence from the Caribbean. <i>Ocean Coast Manage.</i> 2017;149: 52-68.                                                                                   | Bonaire                          | Reef health monitoring                                                                 | Observation of coral cover and visibility                                                                                                                                  |
| Robertson DR, Simoes N, Gutierrez Rodriguez C, Pineros VJ, Perez-Espana H. An Indo-Pacific damselfish well established in the southern Gulf of Mexico: prospects for a wider, adverse invasion. <i>JOSF.</i> 2016;19: 1-17.                                    | Gulf of Mexico                   | Alien species monitoring                                                               | Sighting of species                                                                                                                                                        |
| Roelfsema C, Thurstan R, Begger M, Dudgeon C, Loder J, Kovacs E, et al. A citizen science approach: a detailed ecological assessment of subtropical reefs at Point Lookout, Australia. <i>PLoS One.</i> 2016;11(10): e0163407.                                 | South-East Queensland, Australia | Environmental monitoring, subtropical reef monitoring, environmental impact assessment | Mapping of habitat features, recording of substrate, fish and invertebrate composition, and quantifying impacts (e.g., occurrence of substrate damage, presence of litter) |
| Savage JM, Osborne PE, Hudson MD. Effectiveness of community and volunteer based coral reef monitoring in Cambodia. <i>Aquat Conserv.</i> 2017;27(2): 340-352.                                                                                                 | Cambodia                         | Coral reef monitoring                                                                  | Observation and count of indicator species along transects                                                                                                                 |
| Schultz JA, Cloutier RN, Côté IM. Evidence for a trophic cascade on rocky reefs following sea                                                                                                                                                                  | British Columbia,                | Trophic cascade                                                                        | Species identification, observation of                                                                                                                                     |

|                                                                                                                                                                                                                                                            |                          |                                                     |                                                                 |
|------------------------------------------------------------------------------------------------------------------------------------------------------------------------------------------------------------------------------------------------------------|--------------------------|-----------------------------------------------------|-----------------------------------------------------------------|
| star mass mortality in British Columbia. PeerJ 2016;4: e1980.                                                                                                                                                                                              | Canada                   | monitoring following sea star mass mortality        | presence/absence and abundance                                  |
| Sini M, Katsanevakis S, Koukourouvli N, Gerovasileiou V, Dailianis T, Buhl-Mortensen L, et al. Assembling ecological pieces to reconstruct the conservation puzzle of the Aegean Sea. Front Mar Sci. 2017;4: 347.                                          | Aegean Sea               | Information to map ecological features              | Questionnaire survey (ecological knowledge)                     |
| Stuart-Smith RD, Edgar GJ, Barrett NS, Bates AE, Baker SC, Bax NJ, et al. Assessing national biodiversity trends for rocky and coral reefs through the integration of citizen science and scientific monitoring programs. Bioscience. 2017;67(2): 134-146. | Australia                | Reef monitoring                                     | Observation and count of species along transects, photoquadrats |
| Tolimieri N, Holmes EE, Williams GD, Pacunski R, Lowry D. Population assessment using multivariate time-series analysis: a case study of rockfishes in Puget Sound. Ecol Evol. 2017;7(8): 2846-2860.                                                       | Puget Sound, USA         | Rockfish population assessment                      | Observation of abundance                                        |
| Turicchia E, Cerrano C, Abbiati M, Ponti M. From Citizen Sciences to environmental quality assessment: the Portofino MPA case study. 41 <sup>st</sup> CIESM. 2016;41: 552.                                                                                 | Italy, Mediterranean Sea | Sensitivity of assemblages in marine protected area | Observation of presence/absence and abundance of taxa           |
| Van Moorsel GW, Bennema FP, Nijland R. First records of the sponge crab <i>Dromia personata</i> (Brachyura) in the Netherlands and its historical findings in the North Sea. Mar Biodivers Rec. 2017;10(1): 28.                                            | Netherlands              | Recording of sponge crab                            | Sightings                                                       |
| Williams JL, Pierce SJ, Fuentes MM, Hamann M. Effectiveness of recreational divers for monitoring sea turtle populations. Endanger Species Res. 2015;26(3): 209-219.                                                                                       | Mozambique               | Sea turtle monitoring                               | Sightings log, survey reporting sightings                       |
| Williams JL, Pierce SJ, Rohner CA, Fuentes MM, Hamann M. Spatial distribution and residency of green and loggerhead sea turtles using coastal reef habitats in southern Mozambique. Front Mar Sci. 2017;3: 288.                                            | Mozambique               | Sea turtle identification and distribution          | Sightings log, photo-ID collection                              |
| Wright S, Hull T, Sivyer DB, Pearce D, Pinnegar JK, Sayer MD, et al. SCUBA divers as oceanographic samplers: the potential of dive computers to augment aquatic temperature monitoring. Sci Rep. 2016;6: 30164.                                            | UK                       | Seawater temperature monitoring                     | Data from dive computers                                        |
