# Supplementary material for: Stirring the strategic direction of scuba diving marine Citizen Science: A survey of active and potential participants
Source: PubMed Central journal article supplement (PMC6095588; doi:10.1371/journal.pone.0202484), 2018-08-16
Supplement: pone.0202484.s002.pdf [file pone.0202484.s002.pdf]

**CITIZEN SCIENCE QUESTIONNAIRE 2015**  
**SECTION A: DEMOGRAPHIC DETAILS**

1. Gender?

|   |   |
|---|---|
| M | 1 |
| F | 2 |

2. Year of birth:

3. Education:

|                         |   |
|-------------------------|---|
| No school               | 1 |
| Matric                  | 2 |
| Diploma or professional | 3 |
| Graduate                | 4 |
| Master degree           | 5 |
| PhD or equivalent       | 6 |

3.1. For answers 3 to 6 can you specify your main subject?  
 \_\_\_\_\_

4. Which country are you from?  
 \_\_\_\_\_

5. Marital status:

|          |   |
|----------|---|
| Single   | 1 |
| Married  | 2 |
| De facto | 3 |
| Divorced | 4 |
| Widow/er | 5 |

6. Occupation:

|             |   |
|-------------|---|
| Student     | 1 |
| Paid work   | 2 |
| Unpaid work | 3 |
| Unemployed  | 4 |
| Retired     | 5 |

6.1. If you are/have been employed, what is/was your profession?  
 \_\_\_\_\_

7. You grew up:

|            |   |
|------------|---|
| By the sea | 1 |
| Inland     | 2 |

**SECTION B: DIVING EXPERIENCE**

1. How many certifications do you hold in each of the following:

| LEVEL                                                                                                                                   | NUMBER |
|-----------------------------------------------------------------------------------------------------------------------------------------|--------|
| A. Basic (Open, Advanced, Rescue)                                                                                                       |        |
| B. Pro (Dive Master, Assistant Instructor/Instructor of any level and speciality)                                                       |        |
| C. Speciality (including caves/caverns, ice, recreational Nitrox, but excluding all those under "technical" and "dry" categories below) |        |
| D. Technical (all types/levels for Trimix, Rebreather, Side Mount, Deco Dive, DPV, etc.)                                                |        |
| E. Dry (Oxygen provider, Gas blender, Equipment specialist, Frist Aid, Boat operator, etc.)                                             |        |
| F. Anything that cannot be listed in the above or are unsure where to place, place here:                                                |        |

2. Which certifying agency, among those that issued your certifications, represents you the most?  
 \_\_\_\_\_

3. In what year did you start diving?  
 \_\_\_\_\_

4. How many dives have you logged since you started diving?  
 \_\_\_\_\_

5. How many dives a year do you log?  
 \_\_\_\_\_

6. Is scuba diving your primary job?

|     |    |
|-----|----|
| YES | NO |
|-----|----|

**SECTION C: CITIZEN SCIENCE**

**Citizen Science is defined as any involvement of volunteer participants in the generation of scientific knowledge, that is, observation, sampling, collection of data, and analysis of data, which enter the normal scientific production cycle, ideally leading to reports supporting management decisions and scientific publications.**

1. As a diver, are you or have you been involved in Citizen Science?

|     |                                                                         |
|-----|-------------------------------------------------------------------------|
| YES | <b>If your answer was YES, please complete the rest of this section</b> |
| NO  | <b>If your answer was NO, please move to section D</b>                  |

2. How many Citizen Science projects have you participated in, including current ones?

|                       |                              |                |
|-----------------------|------------------------------|----------------|
| 2.1. Name of project: | 2.2. No. times participated: | 2.3. How long: |
| _____                 | _____                        | _____          |
| _____                 | _____                        | _____          |
| _____                 | _____                        | _____          |

3. Please provide the following information about the latest Citizen Science project you are/have been involved in as a diver (tick boxes where appropriate):

|                                                                                                                                                                                                                                                                                          |                                   |                                                              |                                          |   |                            |   |                |   |                  |   |                                                                                                                                                                                                              |                    |   |             |   |                  |   |                  |   |                                                                                                                                                                                                                                                                                                                                                                   |              |   |                      |   |                       |   |                       |   |         |   |                            |   |                  |   |                                                                                                                                                                                                                                                                                                                                                                                                                                                                                               |                                        |   |                               |   |                               |   |                                  |   |                                   |   |                 |   |                            |   |                  |   |
|------------------------------------------------------------------------------------------------------------------------------------------------------------------------------------------------------------------------------------------------------------------------------------------|-----------------------------------|--------------------------------------------------------------|------------------------------------------|---|----------------------------|---|----------------|---|------------------|---|--------------------------------------------------------------------------------------------------------------------------------------------------------------------------------------------------------------|--------------------|---|-------------|---|------------------|---|------------------|---|-------------------------------------------------------------------------------------------------------------------------------------------------------------------------------------------------------------------------------------------------------------------------------------------------------------------------------------------------------------------|--------------|---|----------------------|---|-----------------------|---|-----------------------|---|---------|---|----------------------------|---|------------------|---|-----------------------------------------------------------------------------------------------------------------------------------------------------------------------------------------------------------------------------------------------------------------------------------------------------------------------------------------------------------------------------------------------------------------------------------------------------------------------------------------------|----------------------------------------|---|-------------------------------|---|-------------------------------|---|----------------------------------|---|-----------------------------------|---|-----------------|---|----------------------------|---|------------------|---|
| 3.1. Name of project: _____                                                                                                                                                                                                                                                              | 3.2. Location: _____              | 3.3 How long have you participated in this CS project? _____ | 3.7. The data are (tick all that apply): |   |                            |   |                |   |                  |   |                                                                                                                                                                                                              |                    |   |             |   |                  |   |                  |   |                                                                                                                                                                                                                                                                                                                                                                   |              |   |                      |   |                       |   |                       |   |         |   |                            |   |                  |   |                                                                                                                                                                                                                                                                                                                                                                                                                                                                                               |                                        |   |                               |   |                               |   |                                  |   |                                   |   |                 |   |                            |   |                  |   |
| 3.4. Subject:                                                                                                                                                                                                                                                                            | 3.5. Your role:                   | 3.6. Type of data you collect (tick all that apply):         |                                          |   |                            |   |                |   |                  |   |                                                                                                                                                                                                              |                    |   |             |   |                  |   |                  |   |                                                                                                                                                                                                                                                                                                                                                                   |              |   |                      |   |                       |   |                       |   |         |   |                            |   |                  |   |                                                                                                                                                                                                                                                                                                                                                                                                                                                                                               |                                        |   |                               |   |                               |   |                                  |   |                                   |   |                 |   |                            |   |                  |   |
| <table border="1"> <tr><td>Biology, ecology and conservation</td><td>1</td></tr> <tr><td>Medicine and safety</td><td>2</td></tr> <tr><td>Technology and engineering</td><td>3</td></tr> <tr><td>Social science</td><td>4</td></tr> <tr><td>Other (specify):</td><td>5</td></tr> </table> | Biology, ecology and conservation | 1                                                            | Medicine and safety                      | 2 | Technology and engineering | 3 | Social science | 4 | Other (specify): | 5 | <table border="1"> <tr><td>Training scientist</td><td>1</td></tr> <tr><td>Coordinator</td><td>2</td></tr> <tr><td>Active volunteer</td><td>3</td></tr> <tr><td>Other (specify):</td><td>4</td></tr> </table> | Training scientist | 1 | Coordinator | 2 | Active volunteer | 3 | Other (specify): | 4 | <table border="1"> <tr><td>Images/video</td><td>1</td></tr> <tr><td>Recordings from tool</td><td>2</td></tr> <tr><td>Verbal communications</td><td>3</td></tr> <tr><td>Written numbers/notes</td><td>4</td></tr> <tr><td>Samples</td><td>5</td></tr> <tr><td>I did not collect any data</td><td>6</td></tr> <tr><td>Other (specify):</td><td>7</td></tr> </table> | Images/video | 1 | Recordings from tool | 2 | Verbal communications | 3 | Written numbers/notes | 4 | Samples | 5 | I did not collect any data | 6 | Other (specify): | 7 | <table border="1"> <tr><td>Environmental (e.g. water temperature)</td><td>1</td></tr> <tr><td>Biological/ecological (flora)</td><td>2</td></tr> <tr><td>Biological/ecological (fauna)</td><td>3</td></tr> <tr><td>Physiological (myself or others)</td><td>4</td></tr> <tr><td>Human behaviour (mine or others')</td><td>5</td></tr> <tr><td>Social/cultural</td><td>6</td></tr> <tr><td>I did not collect any data</td><td>7</td></tr> <tr><td>Other (specify):</td><td>8</td></tr> </table> | Environmental (e.g. water temperature) | 1 | Biological/ecological (flora) | 2 | Biological/ecological (fauna) | 3 | Physiological (myself or others) | 4 | Human behaviour (mine or others') | 5 | Social/cultural | 6 | I did not collect any data | 7 | Other (specify): | 8 |
| Biology, ecology and conservation                                                                                                                                                                                                                                                        | 1                                 |                                                              |                                          |   |                            |   |                |   |                  |   |                                                                                                                                                                                                              |                    |   |             |   |                  |   |                  |   |                                                                                                                                                                                                                                                                                                                                                                   |              |   |                      |   |                       |   |                       |   |         |   |                            |   |                  |   |                                                                                                                                                                                                                                                                                                                                                                                                                                                                                               |                                        |   |                               |   |                               |   |                                  |   |                                   |   |                 |   |                            |   |                  |   |
| Medicine and safety                                                                                                                                                                                                                                                                      | 2                                 |                                                              |                                          |   |                            |   |                |   |                  |   |                                                                                                                                                                                                              |                    |   |             |   |                  |   |                  |   |                                                                                                                                                                                                                                                                                                                                                                   |              |   |                      |   |                       |   |                       |   |         |   |                            |   |                  |   |                                                                                                                                                                                                                                                                                                                                                                                                                                                                                               |                                        |   |                               |   |                               |   |                                  |   |                                   |   |                 |   |                            |   |                  |   |
| Technology and engineering                                                                                                                                                                                                                                                               | 3                                 |                                                              |                                          |   |                            |   |                |   |                  |   |                                                                                                                                                                                                              |                    |   |             |   |                  |   |                  |   |                                                                                                                                                                                                                                                                                                                                                                   |              |   |                      |   |                       |   |                       |   |         |   |                            |   |                  |   |                                                                                                                                                                                                                                                                                                                                                                                                                                                                                               |                                        |   |                               |   |                               |   |                                  |   |                                   |   |                 |   |                            |   |                  |   |
| Social science                                                                                                                                                                                                                                                                           | 4                                 |                                                              |                                          |   |                            |   |                |   |                  |   |                                                                                                                                                                                                              |                    |   |             |   |                  |   |                  |   |                                                                                                                                                                                                                                                                                                                                                                   |              |   |                      |   |                       |   |                       |   |         |   |                            |   |                  |   |                                                                                                                                                                                                                                                                                                                                                                                                                                                                                               |                                        |   |                               |   |                               |   |                                  |   |                                   |   |                 |   |                            |   |                  |   |
| Other (specify):                                                                                                                                                                                                                                                                         | 5                                 |                                                              |                                          |   |                            |   |                |   |                  |   |                                                                                                                                                                                                              |                    |   |             |   |                  |   |                  |   |                                                                                                                                                                                                                                                                                                                                                                   |              |   |                      |   |                       |   |                       |   |         |   |                            |   |                  |   |                                                                                                                                                                                                                                                                                                                                                                                                                                                                                               |                                        |   |                               |   |                               |   |                                  |   |                                   |   |                 |   |                            |   |                  |   |
| Training scientist                                                                                                                                                                                                                                                                       | 1                                 |                                                              |                                          |   |                            |   |                |   |                  |   |                                                                                                                                                                                                              |                    |   |             |   |                  |   |                  |   |                                                                                                                                                                                                                                                                                                                                                                   |              |   |                      |   |                       |   |                       |   |         |   |                            |   |                  |   |                                                                                                                                                                                                                                                                                                                                                                                                                                                                                               |                                        |   |                               |   |                               |   |                                  |   |                                   |   |                 |   |                            |   |                  |   |
| Coordinator                                                                                                                                                                                                                                                                              | 2                                 |                                                              |                                          |   |                            |   |                |   |                  |   |                                                                                                                                                                                                              |                    |   |             |   |                  |   |                  |   |                                                                                                                                                                                                                                                                                                                                                                   |              |   |                      |   |                       |   |                       |   |         |   |                            |   |                  |   |                                                                                                                                                                                                                                                                                                                                                                                                                                                                                               |                                        |   |                               |   |                               |   |                                  |   |                                   |   |                 |   |                            |   |                  |   |
| Active volunteer                                                                                                                                                                                                                                                                         | 3                                 |                                                              |                                          |   |                            |   |                |   |                  |   |                                                                                                                                                                                                              |                    |   |             |   |                  |   |                  |   |                                                                                                                                                                                                                                                                                                                                                                   |              |   |                      |   |                       |   |                       |   |         |   |                            |   |                  |   |                                                                                                                                                                                                                                                                                                                                                                                                                                                                                               |                                        |   |                               |   |                               |   |                                  |   |                                   |   |                 |   |                            |   |                  |   |
| Other (specify):                                                                                                                                                                                                                                                                         | 4                                 |                                                              |                                          |   |                            |   |                |   |                  |   |                                                                                                                                                                                                              |                    |   |             |   |                  |   |                  |   |                                                                                                                                                                                                                                                                                                                                                                   |              |   |                      |   |                       |   |                       |   |         |   |                            |   |                  |   |                                                                                                                                                                                                                                                                                                                                                                                                                                                                                               |                                        |   |                               |   |                               |   |                                  |   |                                   |   |                 |   |                            |   |                  |   |
| Images/video                                                                                                                                                                                                                                                                             | 1                                 |                                                              |                                          |   |                            |   |                |   |                  |   |                                                                                                                                                                                                              |                    |   |             |   |                  |   |                  |   |                                                                                                                                                                                                                                                                                                                                                                   |              |   |                      |   |                       |   |                       |   |         |   |                            |   |                  |   |                                                                                                                                                                                                                                                                                                                                                                                                                                                                                               |                                        |   |                               |   |                               |   |                                  |   |                                   |   |                 |   |                            |   |                  |   |
| Recordings from tool                                                                                                                                                                                                                                                                     | 2                                 |                                                              |                                          |   |                            |   |                |   |                  |   |                                                                                                                                                                                                              |                    |   |             |   |                  |   |                  |   |                                                                                                                                                                                                                                                                                                                                                                   |              |   |                      |   |                       |   |                       |   |         |   |                            |   |                  |   |                                                                                                                                                                                                                                                                                                                                                                                                                                                                                               |                                        |   |                               |   |                               |   |                                  |   |                                   |   |                 |   |                            |   |                  |   |
| Verbal communications                                                                                                                                                                                                                                                                    | 3                                 |                                                              |                                          |   |                            |   |                |   |                  |   |                                                                                                                                                                                                              |                    |   |             |   |                  |   |                  |   |                                                                                                                                                                                                                                                                                                                                                                   |              |   |                      |   |                       |   |                       |   |         |   |                            |   |                  |   |                                                                                                                                                                                                                                                                                                                                                                                                                                                                                               |                                        |   |                               |   |                               |   |                                  |   |                                   |   |                 |   |                            |   |                  |   |
| Written numbers/notes                                                                                                                                                                                                                                                                    | 4                                 |                                                              |                                          |   |                            |   |                |   |                  |   |                                                                                                                                                                                                              |                    |   |             |   |                  |   |                  |   |                                                                                                                                                                                                                                                                                                                                                                   |              |   |                      |   |                       |   |                       |   |         |   |                            |   |                  |   |                                                                                                                                                                                                                                                                                                                                                                                                                                                                                               |                                        |   |                               |   |                               |   |                                  |   |                                   |   |                 |   |                            |   |                  |   |
| Samples                                                                                                                                                                                                                                                                                  | 5                                 |                                                              |                                          |   |                            |   |                |   |                  |   |                                                                                                                                                                                                              |                    |   |             |   |                  |   |                  |   |                                                                                                                                                                                                                                                                                                                                                                   |              |   |                      |   |                       |   |                       |   |         |   |                            |   |                  |   |                                                                                                                                                                                                                                                                                                                                                                                                                                                                                               |                                        |   |                               |   |                               |   |                                  |   |                                   |   |                 |   |                            |   |                  |   |
| I did not collect any data                                                                                                                                                                                                                                                               | 6                                 |                                                              |                                          |   |                            |   |                |   |                  |   |                                                                                                                                                                                                              |                    |   |             |   |                  |   |                  |   |                                                                                                                                                                                                                                                                                                                                                                   |              |   |                      |   |                       |   |                       |   |         |   |                            |   |                  |   |                                                                                                                                                                                                                                                                                                                                                                                                                                                                                               |                                        |   |                               |   |                               |   |                                  |   |                                   |   |                 |   |                            |   |                  |   |
| Other (specify):                                                                                                                                                                                                                                                                         | 7                                 |                                                              |                                          |   |                            |   |                |   |                  |   |                                                                                                                                                                                                              |                    |   |             |   |                  |   |                  |   |                                                                                                                                                                                                                                                                                                                                                                   |              |   |                      |   |                       |   |                       |   |         |   |                            |   |                  |   |                                                                                                                                                                                                                                                                                                                                                                                                                                                                                               |                                        |   |                               |   |                               |   |                                  |   |                                   |   |                 |   |                            |   |                  |   |
| Environmental (e.g. water temperature)                                                                                                                                                                                                                                                   | 1                                 |                                                              |                                          |   |                            |   |                |   |                  |   |                                                                                                                                                                                                              |                    |   |             |   |                  |   |                  |   |                                                                                                                                                                                                                                                                                                                                                                   |              |   |                      |   |                       |   |                       |   |         |   |                            |   |                  |   |                                                                                                                                                                                                                                                                                                                                                                                                                                                                                               |                                        |   |                               |   |                               |   |                                  |   |                                   |   |                 |   |                            |   |                  |   |
| Biological/ecological (flora)                                                                                                                                                                                                                                                            | 2                                 |                                                              |                                          |   |                            |   |                |   |                  |   |                                                                                                                                                                                                              |                    |   |             |   |                  |   |                  |   |                                                                                                                                                                                                                                                                                                                                                                   |              |   |                      |   |                       |   |                       |   |         |   |                            |   |                  |   |                                                                                                                                                                                                                                                                                                                                                                                                                                                                                               |                                        |   |                               |   |                               |   |                                  |   |                                   |   |                 |   |                            |   |                  |   |
| Biological/ecological (fauna)                                                                                                                                                                                                                                                            | 3                                 |                                                              |                                          |   |                            |   |                |   |                  |   |                                                                                                                                                                                                              |                    |   |             |   |                  |   |                  |   |                                                                                                                                                                                                                                                                                                                                                                   |              |   |                      |   |                       |   |                       |   |         |   |                            |   |                  |   |                                                                                                                                                                                                                                                                                                                                                                                                                                                                                               |                                        |   |                               |   |                               |   |                                  |   |                                   |   |                 |   |                            |   |                  |   |
| Physiological (myself or others)                                                                                                                                                                                                                                                         | 4                                 |                                                              |                                          |   |                            |   |                |   |                  |   |                                                                                                                                                                                                              |                    |   |             |   |                  |   |                  |   |                                                                                                                                                                                                                                                                                                                                                                   |              |   |                      |   |                       |   |                       |   |         |   |                            |   |                  |   |                                                                                                                                                                                                                                                                                                                                                                                                                                                                                               |                                        |   |                               |   |                               |   |                                  |   |                                   |   |                 |   |                            |   |                  |   |
| Human behaviour (mine or others')                                                                                                                                                                                                                                                        | 5                                 |                                                              |                                          |   |                            |   |                |   |                  |   |                                                                                                                                                                                                              |                    |   |             |   |                  |   |                  |   |                                                                                                                                                                                                                                                                                                                                                                   |              |   |                      |   |                       |   |                       |   |         |   |                            |   |                  |   |                                                                                                                                                                                                                                                                                                                                                                                                                                                                                               |                                        |   |                               |   |                               |   |                                  |   |                                   |   |                 |   |                            |   |                  |   |
| Social/cultural                                                                                                                                                                                                                                                                          | 6                                 |                                                              |                                          |   |                            |   |                |   |                  |   |                                                                                                                                                                                                              |                    |   |             |   |                  |   |                  |   |                                                                                                                                                                                                                                                                                                                                                                   |              |   |                      |   |                       |   |                       |   |         |   |                            |   |                  |   |                                                                                                                                                                                                                                                                                                                                                                                                                                                                                               |                                        |   |                               |   |                               |   |                                  |   |                                   |   |                 |   |                            |   |                  |   |
| I did not collect any data                                                                                                                                                                                                                                                               | 7                                 |                                                              |                                          |   |                            |   |                |   |                  |   |                                                                                                                                                                                                              |                    |   |             |   |                  |   |                  |   |                                                                                                                                                                                                                                                                                                                                                                   |              |   |                      |   |                       |   |                       |   |         |   |                            |   |                  |   |                                                                                                                                                                                                                                                                                                                                                                                                                                                                                               |                                        |   |                               |   |                               |   |                                  |   |                                   |   |                 |   |                            |   |                  |   |
| Other (specify):                                                                                                                                                                                                                                                                         | 8                                 |                                                              |                                          |   |                            |   |                |   |                  |   |                                                                                                                                                                                                              |                    |   |             |   |                  |   |                  |   |                                                                                                                                                                                                                                                                                                                                                                   |              |   |                      |   |                       |   |                       |   |         |   |                            |   |                  |   |                                                                                                                                                                                                                                                                                                                                                                                                                                                                                               |                                        |   |                               |   |                               |   |                                  |   |                                   |   |                 |   |                            |   |                  |   |

|                                                                                                                                                                                                                                                                |                                   |   |               |   |            |   |                            |   |                  |   |                                                                                                                                                                                   |       |   |          |   |          |   |               |   |
|----------------------------------------------------------------------------------------------------------------------------------------------------------------------------------------------------------------------------------------------------------------|-----------------------------------|---|---------------|---|------------|---|----------------------------|---|------------------|---|-----------------------------------------------------------------------------------------------------------------------------------------------------------------------------------|-------|---|----------|---|----------|---|---------------|---|
| 3.8. Place of data collection:                                                                                                                                                                                                                                 | 3.9. Geographic scale of project: |   |               |   |            |   |                            |   |                  |   |                                                                                                                                                                                   |       |   |          |   |          |   |               |   |
| <table border="1"> <tr><td>Beach/rocky shore</td><td>1</td></tr> <tr><td>Shallow water</td><td>2</td></tr> <tr><td>Deep water</td><td>3</td></tr> <tr><td>I did not collect any data</td><td>4</td></tr> <tr><td>Other (specify):</td><td>5</td></tr> </table> | Beach/rocky shore                 | 1 | Shallow water | 2 | Deep water | 3 | I did not collect any data | 4 | Other (specify): | 5 | <table border="1"> <tr><td>Local</td><td>1</td></tr> <tr><td>Regional</td><td>2</td></tr> <tr><td>National</td><td>3</td></tr> <tr><td>International</td><td>4</td></tr> </table> | Local | 1 | Regional | 2 | National | 3 | International | 4 |
| Beach/rocky shore                                                                                                                                                                                                                                              | 1                                 |   |               |   |            |   |                            |   |                  |   |                                                                                                                                                                                   |       |   |          |   |          |   |               |   |
| Shallow water                                                                                                                                                                                                                                                  | 2                                 |   |               |   |            |   |                            |   |                  |   |                                                                                                                                                                                   |       |   |          |   |          |   |               |   |
| Deep water                                                                                                                                                                                                                                                     | 3                                 |   |               |   |            |   |                            |   |                  |   |                                                                                                                                                                                   |       |   |          |   |          |   |               |   |
| I did not collect any data                                                                                                                                                                                                                                     | 4                                 |   |               |   |            |   |                            |   |                  |   |                                                                                                                                                                                   |       |   |          |   |          |   |               |   |
| Other (specify):                                                                                                                                                                                                                                               | 5                                 |   |               |   |            |   |                            |   |                  |   |                                                                                                                                                                                   |       |   |          |   |          |   |               |   |
| Local                                                                                                                                                                                                                                                          | 1                                 |   |               |   |            |   |                            |   |                  |   |                                                                                                                                                                                   |       |   |          |   |          |   |               |   |
| Regional                                                                                                                                                                                                                                                       | 2                                 |   |               |   |            |   |                            |   |                  |   |                                                                                                                                                                                   |       |   |          |   |          |   |               |   |
| National                                                                                                                                                                                                                                                       | 3                                 |   |               |   |            |   |                            |   |                  |   |                                                                                                                                                                                   |       |   |          |   |          |   |               |   |
| International                                                                                                                                                                                                                                                  | 4                                 |   |               |   |            |   |                            |   |                  |   |                                                                                                                                                                                   |       |   |          |   |          |   |               |   |

|                                                                                                                                                                                                                                                    |                                                                      |   |            |   |       |   |        |   |       |   |         |   |                                                                                                                                                                                                                                                                                                                                                                                                                                                   |      |   |                                 |   |         |   |            |   |               |   |                                                 |   |         |   |            |   |                  |   |
|----------------------------------------------------------------------------------------------------------------------------------------------------------------------------------------------------------------------------------------------------|----------------------------------------------------------------------|---|------------|---|-------|---|--------|---|-------|---|---------|---|---------------------------------------------------------------------------------------------------------------------------------------------------------------------------------------------------------------------------------------------------------------------------------------------------------------------------------------------------------------------------------------------------------------------------------------------------|------|---|---------------------------------|---|---------|---|------------|---|---------------|---|-------------------------------------------------|---|---------|---|------------|---|------------------|---|
| 3.10. Temporal span of project :                                                                                                                                                                                                                   | 3.11. Other duties aside from data collection (tick all that apply): |   |            |   |       |   |        |   |       |   |         |   |                                                                                                                                                                                                                                                                                                                                                                                                                                                   |      |   |                                 |   |         |   |            |   |               |   |                                                 |   |         |   |            |   |                  |   |
| <table border="1"> <tr><td>Once off</td><td>1</td></tr> <tr><td>A few days</td><td>2</td></tr> <tr><td>Weeks</td><td>3</td></tr> <tr><td>Months</td><td>4</td></tr> <tr><td>Years</td><td>5</td></tr> <tr><td>Decades</td><td>6</td></tr> </table> | Once off                                                             | 1 | A few days | 2 | Weeks | 3 | Months | 4 | Years | 5 | Decades | 6 | <table border="1"> <tr><td>None</td><td>1</td></tr> <tr><td>Maintenance (e.g. of equipment)</td><td>2</td></tr> <tr><td>Tagging</td><td>3</td></tr> <tr><td>Data entry</td><td>4</td></tr> <tr><td>Data analysis</td><td>5</td></tr> <tr><td>Reporting verbally or through email, web portal</td><td>6</td></tr> <tr><td>Writing</td><td>7</td></tr> <tr><td>Publishing</td><td>8</td></tr> <tr><td>Other (specify):</td><td>9</td></tr> </table> | None | 1 | Maintenance (e.g. of equipment) | 2 | Tagging | 3 | Data entry | 4 | Data analysis | 5 | Reporting verbally or through email, web portal | 6 | Writing | 7 | Publishing | 8 | Other (specify): | 9 |
| Once off                                                                                                                                                                                                                                           | 1                                                                    |   |            |   |       |   |        |   |       |   |         |   |                                                                                                                                                                                                                                                                                                                                                                                                                                                   |      |   |                                 |   |         |   |            |   |               |   |                                                 |   |         |   |            |   |                  |   |
| A few days                                                                                                                                                                                                                                         | 2                                                                    |   |            |   |       |   |        |   |       |   |         |   |                                                                                                                                                                                                                                                                                                                                                                                                                                                   |      |   |                                 |   |         |   |            |   |               |   |                                                 |   |         |   |            |   |                  |   |
| Weeks                                                                                                                                                                                                                                              | 3                                                                    |   |            |   |       |   |        |   |       |   |         |   |                                                                                                                                                                                                                                                                                                                                                                                                                                                   |      |   |                                 |   |         |   |            |   |               |   |                                                 |   |         |   |            |   |                  |   |
| Months                                                                                                                                                                                                                                             | 4                                                                    |   |            |   |       |   |        |   |       |   |         |   |                                                                                                                                                                                                                                                                                                                                                                                                                                                   |      |   |                                 |   |         |   |            |   |               |   |                                                 |   |         |   |            |   |                  |   |
| Years                                                                                                                                                                                                                                              | 5                                                                    |   |            |   |       |   |        |   |       |   |         |   |                                                                                                                                                                                                                                                                                                                                                                                                                                                   |      |   |                                 |   |         |   |            |   |               |   |                                                 |   |         |   |            |   |                  |   |
| Decades                                                                                                                                                                                                                                            | 6                                                                    |   |            |   |       |   |        |   |       |   |         |   |                                                                                                                                                                                                                                                                                                                                                                                                                                                   |      |   |                                 |   |         |   |            |   |               |   |                                                 |   |         |   |            |   |                  |   |
| None                                                                                                                                                                                                                                               | 1                                                                    |   |            |   |       |   |        |   |       |   |         |   |                                                                                                                                                                                                                                                                                                                                                                                                                                                   |      |   |                                 |   |         |   |            |   |               |   |                                                 |   |         |   |            |   |                  |   |
| Maintenance (e.g. of equipment)                                                                                                                                                                                                                    | 2                                                                    |   |            |   |       |   |        |   |       |   |         |   |                                                                                                                                                                                                                                                                                                                                                                                                                                                   |      |   |                                 |   |         |   |            |   |               |   |                                                 |   |         |   |            |   |                  |   |
| Tagging                                                                                                                                                                                                                                            | 3                                                                    |   |            |   |       |   |        |   |       |   |         |   |                                                                                                                                                                                                                                                                                                                                                                                                                                                   |      |   |                                 |   |         |   |            |   |               |   |                                                 |   |         |   |            |   |                  |   |
| Data entry                                                                                                                                                                                                                                         | 4                                                                    |   |            |   |       |   |        |   |       |   |         |   |                                                                                                                                                                                                                                                                                                                                                                                                                                                   |      |   |                                 |   |         |   |            |   |               |   |                                                 |   |         |   |            |   |                  |   |
| Data analysis                                                                                                                                                                                                                                      | 5                                                                    |   |            |   |       |   |        |   |       |   |         |   |                                                                                                                                                                                                                                                                                                                                                                                                                                                   |      |   |                                 |   |         |   |            |   |               |   |                                                 |   |         |   |            |   |                  |   |
| Reporting verbally or through email, web portal                                                                                                                                                                                                    | 6                                                                    |   |            |   |       |   |        |   |       |   |         |   |                                                                                                                                                                                                                                                                                                                                                                                                                                                   |      |   |                                 |   |         |   |            |   |               |   |                                                 |   |         |   |            |   |                  |   |
| Writing                                                                                                                                                                                                                                            | 7                                                                    |   |            |   |       |   |        |   |       |   |         |   |                                                                                                                                                                                                                                                                                                                                                                                                                                                   |      |   |                                 |   |         |   |            |   |               |   |                                                 |   |         |   |            |   |                  |   |
| Publishing                                                                                                                                                                                                                                         | 8                                                                    |   |            |   |       |   |        |   |       |   |         |   |                                                                                                                                                                                                                                                                                                                                                                                                                                                   |      |   |                                 |   |         |   |            |   |               |   |                                                 |   |         |   |            |   |                  |   |
| Other (specify):                                                                                                                                                                                                                                   | 9                                                                    |   |            |   |       |   |        |   |       |   |         |   |                                                                                                                                                                                                                                                                                                                                                                                                                                                   |      |   |                                 |   |         |   |            |   |               |   |                                                 |   |         |   |            |   |                  |   |

|                                                                                                                                                                                                                                   |                                       |   |          |   |           |   |          |   |            |   |                                                                                                                                                                                                                                                                |           |   |                   |   |                    |   |                   |   |                       |   |
|-----------------------------------------------------------------------------------------------------------------------------------------------------------------------------------------------------------------------------------|---------------------------------------|---|----------|---|-----------|---|----------|---|------------|---|----------------------------------------------------------------------------------------------------------------------------------------------------------------------------------------------------------------------------------------------------------------|-----------|---|-------------------|---|--------------------|---|-------------------|---|-----------------------|---|
| 3.12. No. volunteers involved in project:                                                                                                                                                                                         | 3.13. Your commitment to the project: |   |          |   |           |   |          |   |            |   |                                                                                                                                                                                                                                                                |           |   |                   |   |                    |   |                   |   |                       |   |
| <table border="1"> <tr><td>A few tens or less</td><td>1</td></tr> <tr><td>Hundreds</td><td>2</td></tr> <tr><td>Thousands</td><td>3</td></tr> <tr><td>Millions</td><td>4</td></tr> <tr><td>Don't know</td><td>5</td></tr> </table> | A few tens or less                    | 1 | Hundreds | 2 | Thousands | 3 | Millions | 4 | Don't know | 5 | <table border="1"> <tr><td>Once only</td><td>1</td></tr> <tr><td>Once a year or so</td><td>2</td></tr> <tr><td>Once a month or so</td><td>3</td></tr> <tr><td>Once a week or so</td><td>4</td></tr> <tr><td>More than once a week</td><td>5</td></tr> </table> | Once only | 1 | Once a year or so | 2 | Once a month or so | 3 | Once a week or so | 4 | More than once a week | 5 |
| A few tens or less                                                                                                                                                                                                                | 1                                     |   |          |   |           |   |          |   |            |   |                                                                                                                                                                                                                                                                |           |   |                   |   |                    |   |                   |   |                       |   |
| Hundreds                                                                                                                                                                                                                          | 2                                     |   |          |   |           |   |          |   |            |   |                                                                                                                                                                                                                                                                |           |   |                   |   |                    |   |                   |   |                       |   |
| Thousands                                                                                                                                                                                                                         | 3                                     |   |          |   |           |   |          |   |            |   |                                                                                                                                                                                                                                                                |           |   |                   |   |                    |   |                   |   |                       |   |
| Millions                                                                                                                                                                                                                          | 4                                     |   |          |   |           |   |          |   |            |   |                                                                                                                                                                                                                                                                |           |   |                   |   |                    |   |                   |   |                       |   |
| Don't know                                                                                                                                                                                                                        | 5                                     |   |          |   |           |   |          |   |            |   |                                                                                                                                                                                                                                                                |           |   |                   |   |                    |   |                   |   |                       |   |
| Once only                                                                                                                                                                                                                         | 1                                     |   |          |   |           |   |          |   |            |   |                                                                                                                                                                                                                                                                |           |   |                   |   |                    |   |                   |   |                       |   |
| Once a year or so                                                                                                                                                                                                                 | 2                                     |   |          |   |           |   |          |   |            |   |                                                                                                                                                                                                                                                                |           |   |                   |   |                    |   |                   |   |                       |   |
| Once a month or so                                                                                                                                                                                                                | 3                                     |   |          |   |           |   |          |   |            |   |                                                                                                                                                                                                                                                                |           |   |                   |   |                    |   |                   |   |                       |   |
| Once a week or so                                                                                                                                                                                                                 | 4                                     |   |          |   |           |   |          |   |            |   |                                                                                                                                                                                                                                                                |           |   |                   |   |                    |   |                   |   |                       |   |
| More than once a week                                                                                                                                                                                                             | 5                                     |   |          |   |           |   |          |   |            |   |                                                                                                                                                                                                                                                                |           |   |                   |   |                    |   |                   |   |                       |   |

3.14. Did you go through a selection process to participate?

|     |    |
|-----|----|
| YES | NO |
|-----|----|

|                                                                                                                                                                                                                                                                              |                     |   |                       |   |                |   |                                |   |                            |   |                                                                                                                                                                                                                               |      |   |        |   |               |   |            |   |                  |   |
|------------------------------------------------------------------------------------------------------------------------------------------------------------------------------------------------------------------------------------------------------------------------------|---------------------|---|-----------------------|---|----------------|---|--------------------------------|---|----------------------------|---|-------------------------------------------------------------------------------------------------------------------------------------------------------------------------------------------------------------------------------|------|---|--------|---|---------------|---|------------|---|------------------|---|
| 3.15. Generally you collected data:                                                                                                                                                                                                                                          | 3.16. Compensation: |   |                       |   |                |   |                                |   |                            |   |                                                                                                                                                                                                                               |      |   |        |   |               |   |            |   |                  |   |
| <table border="1"> <tr><td>Alone</td><td>1</td></tr> <tr><td>With other volunteers</td><td>2</td></tr> <tr><td>With scientist</td><td>3</td></tr> <tr><td>With scientists and volunteers</td><td>4</td></tr> <tr><td>I did not collect any data</td><td>5</td></tr> </table> | Alone               | 1 | With other volunteers | 2 | With scientist | 3 | With scientists and volunteers | 4 | I did not collect any data | 5 | <table border="1"> <tr><td>None</td><td>1</td></tr> <tr><td>A gift</td><td>2</td></tr> <tr><td>Money payment</td><td>3</td></tr> <tr><td>Employment</td><td>4</td></tr> <tr><td>Other (specify):</td><td>5</td></tr> </table> | None | 1 | A gift | 2 | Money payment | 3 | Employment | 4 | Other (specify): | 5 |
| Alone                                                                                                                                                                                                                                                                        | 1                   |   |                       |   |                |   |                                |   |                            |   |                                                                                                                                                                                                                               |      |   |        |   |               |   |            |   |                  |   |
| With other volunteers                                                                                                                                                                                                                                                        | 2                   |   |                       |   |                |   |                                |   |                            |   |                                                                                                                                                                                                                               |      |   |        |   |               |   |            |   |                  |   |
| With scientist                                                                                                                                                                                                                                                               | 3                   |   |                       |   |                |   |                                |   |                            |   |                                                                                                                                                                                                                               |      |   |        |   |               |   |            |   |                  |   |
| With scientists and volunteers                                                                                                                                                                                                                                               | 4                   |   |                       |   |                |   |                                |   |                            |   |                                                                                                                                                                                                                               |      |   |        |   |               |   |            |   |                  |   |
| I did not collect any data                                                                                                                                                                                                                                                   | 5                   |   |                       |   |                |   |                                |   |                            |   |                                                                                                                                                                                                                               |      |   |        |   |               |   |            |   |                  |   |
| None                                                                                                                                                                                                                                                                         | 1                   |   |                       |   |                |   |                                |   |                            |   |                                                                                                                                                                                                                               |      |   |        |   |               |   |            |   |                  |   |
| A gift                                                                                                                                                                                                                                                                       | 2                   |   |                       |   |                |   |                                |   |                            |   |                                                                                                                                                                                                                               |      |   |        |   |               |   |            |   |                  |   |
| Money payment                                                                                                                                                                                                                                                                | 3                   |   |                       |   |                |   |                                |   |                            |   |                                                                                                                                                                                                                               |      |   |        |   |               |   |            |   |                  |   |
| Employment                                                                                                                                                                                                                                                                   | 4                   |   |                       |   |                |   |                                |   |                            |   |                                                                                                                                                                                                                               |      |   |        |   |               |   |            |   |                  |   |
| Other (specify):                                                                                                                                                                                                                                                             | 5                   |   |                       |   |                |   |                                |   |                            |   |                                                                                                                                                                                                                               |      |   |        |   |               |   |            |   |                  |   |

3.17. Did you receive training before participating?

|                    |   |
|--------------------|---|
| No                 | 1 |
| Brief instructions | 2 |
| Basic training     | 3 |
| Special training   | 4 |

3.18. Where have you heard about this project?

|                  |   |
|------------------|---|
| Organized group  | 1 |
| Word of mouth    | 2 |
| Web              | 3 |
| Other (specify): | 4 |

| 3.19. Materials generally provided: | By me | By the project | By local operators |
|-------------------------------------|-------|----------------|--------------------|
| Data sheets                         | 1     | 1              | 1                  |
| Quadrat/tape measure                | 2     | 2              | 2                  |
| Diving equipment                    | 3     | 3              | 3                  |
| Boats/watercraft                    | 4     | 4              | 4                  |
| Infrastructure                      | 5     | 5              | 5                  |
| Computer/tablet                     | 6     | 6              | 6                  |
| Camera                              | 7     | 7              | 7                  |
| Smartphone                          | 8     | 8              | 8                  |
| GPS                                 | 9     | 9              | 9                  |
| Internet connection                 | 10    | 10             | 10                 |
| Software and applications           | 11    | 11             | 11                 |
| Other (specify):                    | 12    | 12             | 12                 |

4. Please indicate your level of satisfaction with your experience as a Citizen Scientist in general:

|                                             | Unsatisfied | Neutral | Satisfied | Not applicable |
|---------------------------------------------|-------------|---------|-----------|----------------|
| Education received                          | 1           | 2       | 3         | 4              |
| Educational material                        | 1           | 2       | 3         | 4              |
| Training received                           | 1           | 2       | 3         | 4              |
| Equipment and tools provided                | 1           | 2       | 3         | 4              |
| Quality of the data produced                | 1           | 2       | 3         | 4              |
| Guidance by the coordinators                | 1           | 2       | 3         | 4              |
| General preparation of volunteers           | 1           | 2       | 3         | 4              |
| Overall contribution made by the volunteers | 1           | 2       | 3         | 4              |
| Networking and meeting people               | 1           | 2       | 3         | 4              |
| The availability of new technology          | 1           | 2       | 3         | 4              |
| Use of available technology                 | 1           | 2       | 3         | 4              |
| The funding the project receives            | 1           | 2       | 3         | 4              |
| Project's webpage/social media              | 1           | 2       | 3         | 4              |
| Overall outreach of the project             | 1           | 2       | 3         | 4              |
| Communication throughout                    | 1           | 2       | 3         | 4              |
| Feedback on the results                     | 1           | 2       | 3         | 4              |
| Overall quality of the experience           | 1           | 2       | 3         | 4              |
| Overall success of the project              | 1           | 2       | 3         | 4              |
| The reward received                         | 1           | 2       | 3         | 4              |
| The contribution of the project to science  | 1           | 2       | 3         | 4              |
| Other (specify):                            | 1           | 2       | 3         | 4              |

Thank you! © Green Bubbles 2015 www.greenbubbles.eu

3.20. How far do/did you normally travel to partake in this CS project?

---

3.21. How much of your money do/did you normally spend for each trip dedicated to this CS project?

---

5. Please indicate the reasons why you partook/partake in Citizen Science as a diver:

|                                              | Disagree | Neutral | Agree |
|----------------------------------------------|----------|---------|-------|
| For the sake of science                      | 1        | 2       | 3     |
| For my interest in the subject under study   | 1        | 2       | 3     |
| For the sake of society/the environment      | 1        | 2       | 3     |
| For medical and safety reasons               | 1        | 2       | 3     |
| For the contribution I can give              | 1        | 2       | 3     |
| For emotional satisfaction                   | 1        | 2       | 3     |
| For the knowledge gained                     | 1        | 2       | 3     |
| For the reward                               | 1        | 2       | 3     |
| For personal satisfaction                    | 1        | 2       | 3     |
| For public recognition                       | 1        | 2       | 3     |
| For networks and collaborations              | 1        | 2       | 3     |
| To access new technology                     | 1        | 2       | 3     |
| For the sake of future generations           | 1        | 2       | 3     |
| To spend time with like minded people        | 1        | 2       | 3     |
| To acquire skills                            | 1        | 2       | 3     |
| To spend quality time with my family/friends | 1        | 2       | 3     |
| Other (specify):                             | 1        | 2       | 3     |

6. As a diver, are you going to participate in Citizen Science in the future?

|     |    |
|-----|----|
| YES | NO |
|-----|----|

6.1. If your answer was NO, can you briefly explain why?

---



---



---

7. Are there any comments you wish to make regarding Citizen Science or the specific CS project you reported about?

---



---



---



---

**SECTION D: WILLINGNESS TO PARTICIPATE IN CITIZEN SCIENCE**

1. As a diver, have you ever been interested in Citizen Science?

**YES** Please answer questions 1.1. and 1.2.

1.1. What type of Citizen Science interests you?

|                                   |   |
|-----------------------------------|---|
| Biology, ecology and conservation | 1 |
| Medicine                          | 2 |
| Technology and engineering        | 3 |
| Social science                    | 4 |
| Other (specify):                  | 5 |

1.2. Why is Citizen Science of interest to you?

|                                                          | Disagree | Neutral | Agree |
|----------------------------------------------------------|----------|---------|-------|
| I have a general interest in science                     | 1        | 2       | 3     |
| It deals with fields I am interested in                  | 1        | 2       | 3     |
| It makes a contribution to society and the environment   | 1        | 2       | 3     |
| It makes a contribution to science                       | 1        | 2       | 3     |
| It is a powerful scientific tool                         | 1        | 2       | 3     |
| It engages citizens in developing an interest in science | 1        | 2       | 3     |
| It empowers people                                       | 1        | 2       | 3     |
| It is educational                                        | 1        | 2       | 3     |
| It incentivises citizens                                 | 1        | 2       | 3     |
| It gives people an opportunity to make connections       | 1        | 2       | 3     |
| It grants people access to new technology                | 1        | 2       | 3     |
| It is a socialising experience                           | 1        | 2       | 3     |
| Others told me it is good                                | 1        | 2       | 3     |
| Other (specify):                                         | 1        | 2       | 3     |

2. As a diver, would you be interested in participating in Citizen Science?

**YES** Please answer questions 2.1. and 2.2.

2.1. Why have you not participated before?

|                                                       | Disagree | Neutral | Agree |
|-------------------------------------------------------|----------|---------|-------|
| I have/had no time                                    | 1        | 2       | 3     |
| I am/was too young                                    | 1        | 2       | 3     |
| I have/had limited knowledge of Citizen Science       | 1        | 2       | 3     |
| I have/had problems with access (e.g. no car)         | 1        | 2       | 3     |
| I have never been invited by anyone                   | 1        | 2       | 3     |
| I am unsure how to look for Citizen Science projects  | 1        | 2       | 3     |
| I am unsure how to join a Citizen Science project     | 1        | 2       | 3     |
| Available projects are usually far from where I live  | 1        | 2       | 3     |
| There is/was no availability                          | 1        | 2       | 3     |
| I feel that I do not have the skills                  | 1        | 2       | 3     |
| Others tell/told me it is no good                     | 1        | 2       | 3     |
| It seems/seemed complicated                           | 1        | 2       | 3     |
| The technology was old (e.g. no use of smartphone)    | 1        | 2       | 3     |
| I had no money to invest in it                        | 1        | 2       | 3     |
| My equipment is inadequate                            | 1        | 2       | 3     |
| The website of the project I like is unattractive     | 1        | 2       | 3     |
| There was no training available                       | 1        | 2       | 3     |
| The operator did not give me a chance to volunteer    | 1        | 2       | 3     |
| The provided material was poor and not in my language | 1        | 2       | 3     |
| Other (specify):                                      | 1        | 2       | 3     |

2.2. What would convince you to participate?

|                                                  | Disagree | Neutral | Agree |
|--------------------------------------------------|----------|---------|-------|
| I am already convinced                           | 1        | 2       | 3     |
| Someone to come and talk about it                | 1        | 2       | 3     |
| Logistic help (e.g. car lift)                    | 1        | 2       | 3     |
| An incentive like money                          | 1        | 2       | 3     |
| An incentive like a gift voucher or other        | 1        | 2       | 3     |
| A training course                                | 1        | 2       | 3     |
| Promotional material in my language              | 1        | 2       | 3     |
| Better media coverage                            | 1        | 2       | 3     |
| More availability                                | 1        | 2       | 3     |
| Better organisation                              | 1        | 2       | 3     |
| Better/new technology                            | 1        | 2       | 3     |
| If the operator gives me a chance to participate | 1        | 2       | 3     |
| A better website for the project                 | 1        | 2       | 3     |
| If I am provided with equipment to work with     | 1        | 2       | 3     |
| Earning a higher income                          | 1        | 2       | 3     |
| Other (specify):                                 | 1        | 2       | 3     |

3. Are there any comments you wish to make regarding Citizen Science?

---



---



---



---



---

**NO** Please answer question 1.3.

1.3. Why is Citizen Science not attractive to you?

|                                                         | Disagree | Neutral | Agree |
|---------------------------------------------------------|----------|---------|-------|
| I do not really know much about it                      | 1        | 2       | 3     |
| I have no interest in science                           | 1        | 2       | 3     |
| It does not cover those fields I am interested in       | 1        | 2       | 3     |
| It makes no contribution to science                     | 1        | 2       | 3     |
| It makes no contribution to society and the environment | 1        | 2       | 3     |
| It is not an effective scientific tool                  | 1        | 2       | 3     |
| It is a waste of time                                   | 1        | 2       | 3     |
| It costs money                                          | 1        | 2       | 3     |
| It exploits citizens as volunteers                      | 1        | 2       | 3     |
| It is not rewarding                                     | 1        | 2       | 3     |
| It is not well organised                                | 1        | 2       | 3     |
| Others told me it is no good                            | 1        | 2       | 3     |
| It makes no good use of available technology            | 1        | 2       | 3     |
| It is discriminatory towards people that have no skills | 1        | 2       | 3     |
| It is boring                                            | 1        | 2       | 3     |
| It seems difficult                                      | 1        | 2       | 3     |
| If I dive I just want to enjoy my time                  | 1        | 2       | 3     |
| I do not trust those who organise CS projects           | 1        | 2       | 3     |
| I had a bad experience with CS before                   | 1        | 2       | 3     |
| Other (specify):                                        | 1        | 2       | 3     |

**NO** Please answer question 2.3. and 2.4.

2.3. Why would you not be interested?

|                                                   | Disagree | Neutral | Agree |
|---------------------------------------------------|----------|---------|-------|
| For the same reasons I agreed to in question 1.3. | 1        | 2       | 3     |
| I have no time                                    | 1        | 2       | 3     |
| I am too young/too old                            | 1        | 2       | 3     |
| I have problems with access (e.g. no car)         | 1        | 2       | 3     |
| It seems difficult                                | 1        | 2       | 3     |
| Available projects are far from where I live      | 1        | 2       | 3     |
| I feel that I do not have the skills              | 1        | 2       | 3     |
| There is no benefit to me                         | 1        | 2       | 3     |
| I earn no/too little money                        | 1        | 2       | 3     |
| Other (specify):                                  | 1        | 2       | 3     |

2.4. What would convince you to become interested?

|                                           | Disagree | Neutral | Agree |
|-------------------------------------------|----------|---------|-------|
| Nothing                                   | 1        | 2       | 3     |
| Someone to come and talk about it         | 1        | 2       | 3     |
| Logistic help (e.g. car lift)             | 1        | 2       | 3     |
| An incentive like money                   | 1        | 2       | 3     |
| An incentive like a gift voucher or other | 1        | 2       | 3     |
| Promotional material in my language       | 1        | 2       | 3     |
| Better media coverage                     | 1        | 2       | 3     |
| More availability                         | 1        | 2       | 3     |
| Better organisation                       | 1        | 2       | 3     |
| Better/new technology                     | 1        | 2       | 3     |
| A nice website                            | 1        | 2       | 3     |
| A training course                         | 1        | 2       | 3     |
| If the operator invites me to participate | 1        | 2       | 3     |
| To be offered equipment to work with      | 1        | 2       | 3     |
| Earning a higher income                   | 1        | 2       | 3     |
| Other (specify):                          | 1        | 2       | 3     |

Thank you! © Green Bubbles 2015 www.greenbubbles.eu

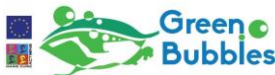

The Green Bubbles project has received funding from the European Union's Horizon 2020 research and innovation programme under the Marie Skłodowska-Curie grant agreement No 643712. This document reflects only the authors' view. The Research Executive Agency is not responsible for any use that may be made of the information it contains.
