# Supplementary material for: Stirring the strategic direction of scuba diving marine Citizen Science: A survey of active and potential participants
Source: PubMed Central journal article supplement (PMC6095588; doi:10.1371/journal.pone.0202484), 2018-08-16
Supplement: pone.0202484.s003.pdf [file pone.0202484.s003.pdf]

**QUESTIONARIO SULLA CITIZEN SCIENCE 2015**  
**SEZIONE A: DATI DEMOGRAFICI**

1. Sesso?

|   |   |
|---|---|
| M | 1 |
| F | 2 |

2. Anno di nascita:

3. Livello di educazione:

|                                              |   |
|----------------------------------------------|---|
| Niente scuola                                | 1 |
| Licenza elementare                           | 2 |
| Licenza scuola media inferiore               | 3 |
| Diploma scuola media superiore o equivalente | 4 |
| Laurea (e.g. triennale, specialistica)       | 5 |
| Educazione post laurea (e.g. dottorato)      | 6 |
| Altro (specifica):                           | 7 |

3.1. Se hai risposto da "4" a "7" alla domanda 3, qual è o è stata la tua materia principale?

4. Nazione di origine:

5. Stato civile:

|               |   |
|---------------|---|
| Celibe/nubile | 1 |
| Sposato/a     | 2 |
| Convivente    | 3 |
| Divorziato/a  | 4 |
| Vedovo/a      | 5 |

6. Occupazione:

|                                  |   |
|----------------------------------|---|
| Studente/ssa                     | 1 |
| Lavoro retribuito                | 2 |
| Posiz. lavorativa non retribuita | 3 |
| Nessun impiego                   | 4 |
| Pensionato/a                     | 5 |

6.1. Se sei o sei stato/a impiegato/a, qual è o è stata la tua professione?

7. Sei cresciuto/a:

|                  |   |
|------------------|---|
| Sul mare         | 1 |
| Lontano dal mare | 2 |

**SEZIONE B: ESPERIENZA SUBACQUEA**

1. Quante certificazioni possiedi per ciascuna delle seguenti categorie:

|                                                                                                                                       | Numero |
|---------------------------------------------------------------------------------------------------------------------------------------|--------|
| a. Base (Open, Avanzato, Rescue/Salvamento)                                                                                           |        |
| b. Pro (Dive Master, Assistente Istruttore/Istruttore di qualsiasi livello o specialità)                                              |        |
| c. Specialità (incluse grotte/caverne, ghiaccio, Nitrox ricreativo, ma escluse tutte le certificazioni sotto "tecniche" e "asciutte") |        |
| d. Tecniche (tutti i tipi/livelli per Trimix, Rebreather, Side Mount, Deco Dive/Decompression, DPV, etc.)                             |        |
| e. Asciutte (Somministrazione ossigeno, Gas Blender, Equipment, Primo Soccorso, Boat Operator, etc.)                                  |        |
| f. Per tutto ciò che non è riportato qui sopra o di cui non sei sicuro/a, aggiungi qui:                                               |        |

2. Con quale didattica, tra quelle che hanno rilasciato le tue certificazioni, ti identifichi maggiormente?

3. In che anno hai iniziato ad immergerti?

4. Numero totale di immersioni ad oggi?

5. Quante immersioni fai all'anno in media?

6. Lavori nell'industria subacquea?

|    |    |
|----|----|
| Si | No |
|----|----|

## SEZIONE C: CITIZEN SCIENCE

### COSA È LA CITIZEN SCIENCE?

La Citizen Science coinvolge volontari (non specializzati) in attività che prevedono la generazione di dati, (con osservazioni o campionamento) e/o l'analisi di questi stessi dati, a scopo scientifico.

1. Sei mai stato coinvolto in progetti di Citizen Science come subacqueo/a?

**SI** Se hai risposto **SI**, completa il resto della **sezione C**

**NO** Se hai risposto **NO**, vai alla **sezione D**

2. A quanti progetti di Citizen Science hai partecipato come sub?

2.1. Nome del progetto:

---

2.2. Quante volte hai partecipato:

---

2.3. Durata partecipazione:

---

3. Informazioni sull'ultimo progetto Citizen Science a cui hai partecipato come subacqueo/a:

3.1. Nome del progetto:

---

3.2. Luogo di svolgimento:

---

3.3. Durata della partecipazione:

---

3.4. Hai passato una selezione per partecipare?

---

3.5. Tema principale:

|                                   |   |
|-----------------------------------|---|
| Biologia, ecologia, conservazione | 1 |
| Medicina e sicurezza              | 2 |
| Tecnologia e ingegneria           | 3 |
| Scienze Sociali                   | 4 |
| Altro (specifica):                | 5 |

---

3.6. Il tuo ruolo:

|                        |   |
|------------------------|---|
| Ricercatore istruttore | 1 |
| Coordinatore           | 2 |
| Volontario attivo      | 3 |
| Altro (specifica):     | 4 |

---

3.7. Modalità di raccolta dati:

|                                     |   |
|-------------------------------------|---|
| Immagini/video                      | 1 |
| Registrazioni audio                 | 2 |
| Comunicazioni verbali               | 3 |
| Raccolta di numeri o appunti (dati) | 4 |
| Raccolta di campioni                | 5 |
| Nessuna                             | 6 |
| Altro (specifica):                  | 7 |

---

3.8. Tipo di dati raccolti:

|                                           |   |
|-------------------------------------------|---|
| Ambientali (es. temperatura dell'acqua)   | 1 |
| Biologici/ecologici (flora)               | 2 |
| Biologici/ecologici (fauna)               | 3 |
| Fisiologici (tuoi o di altri)             | 4 |
| Sul comportamento umano (tuoi o di altri) | 5 |
| Sociali/culturali                         | 6 |
| Nessuno                                   | 7 |

Altro (specifica):

---

3.9. Luogo di raccolta dati:

|                                 |   |
|---------------------------------|---|
| Spiaggia/scogliera              | 1 |
| Acque basse/bassi fondali       | 2 |
| Acque profonde/fondali profondi | 3 |
| Nessuno                         | 4 |
| Altro (specifica):              | 5 |

---

3.10. Scala geografica del progetto:

|                |   |
|----------------|---|
| Locale         | 1 |
| Regionale      | 2 |
| Nazionale      | 3 |
| Internazionale | 4 |

3.11. Durata totale del progetto :

|              |   |
|--------------|---|
| Un giorno    | 1 |
| Pochi giorni | 2 |
| Settimane    | 3 |
| Mesi         | 4 |
| Anni         | 5 |
| Decenni      | 6 |

3.12. Responsabilità al di fuori della raccolta dati:

|                                                      |   |
|------------------------------------------------------|---|
| Nessuna                                              | 1 |
| Manutenzione (es. attrezzatura)                      | 2 |
| Tagging/Marcatura                                    | 3 |
| Immissione dati (informatizzazione o in un registro) | 4 |
| Analisi dati                                         | 5 |
| Riportare informazioni via email o simile            | 6 |
| Scrittura (es. report)                               | 7 |
| Pubblicazioni                                        | 8 |
| Altro (specifica):                                   | 9 |

---

3.13. Numero di volontari coinvolti:

|           |   |
|-----------|---|
| Decine    | 1 |
| Centinaia | 2 |
| Migliaia  | 3 |
| Milioni   | 4 |
| Non lo so | 5 |

3.14. Il tuo impegno per il progetto:

|                              |   |
|------------------------------|---|
| Una sola volta               | 1 |
| Una volta all'anno           | 2 |
| Una volta al mese            | 3 |
| Una volta a settimana        | 4 |
| Più di una volta a settimana | 5 |

3.15. In generale, hai raccolto dati:

|                            |   |
|----------------------------|---|
| Da solo                    | 1 |
| Con altri volontari        | 2 |
| Con uno scienziato         | 3 |
| Con scienziati e volontari | 4 |
| Non ho raccolto dati       | 5 |

3.16. Compenso:

|                    |   |
|--------------------|---|
| Nessuno            | 1 |
| Un regalo          | 2 |
| Soldi              | 3 |
| Impiego            | 4 |
| Altro (specifica): | 5 |

---

3.17. Preparazione

|               |   |
|---------------|---|
| Nessuna       | 1 |
| Briefing      | 2 |
| Base          | 3 |
| Specializzata | 4 |

3.18. Come sei venuto a conoscenza del progetto?

|                    |   |
|--------------------|---|
| Organizzatori      | 1 |
| Passaparola        | 2 |
| Internet           | 3 |
| Altro (specifica): | 4 |

---

3.19. Materiali forniti:

| Da diving/scuola sub            |   |   |   |
|---------------------------------|---|---|---|
| Dal progetto                    |   |   |   |
| Da me                           |   |   |   |
| Scheda raccolta dati            | 1 | 2 | 3 |
| Quadrato/metro                  | 1 | 2 | 3 |
| Attrezzatura sub                | 1 | 2 | 3 |
| Barca, gommone                  | 1 | 2 | 3 |
| Infrastruttura (es.laboratorio) | 1 | 2 | 3 |
| Computer/tablet                 | 1 | 2 | 3 |
| Macchina fotografica            | 1 | 2 | 3 |
| Smartphone                      | 1 | 2 | 3 |
| GPS                             | 1 | 2 | 3 |
| Internet                        | 1 | 2 | 3 |
| Software                        | 1 | 2 | 3 |
| Altro (specifica):              | 1 | 2 | 3 |

---

3.20. Quanti chilometri hai viaggiato ogni volta che hai partecipato?

---

3.21. Quanti dei tuoi soldi hai speso ogni volta che hai partecipato?

---

4. Indica il tuo livello di soddisfazione per la tua esperienza di Citizen Science in generale:

|                                               | Non applicabile |   |   |   |
|-----------------------------------------------|-----------------|---|---|---|
|                                               | Soddisfatto     |   |   |   |
|                                               | Neutro          |   |   |   |
|                                               | Insoddisfatto   |   |   |   |
| a. Educazione ricevuta                        | 1               | 2 | 3 | 4 |
| b. Materiale di studio                        | 1               | 2 | 3 | 4 |
| c. Preparazione ricevuta                      | 1               | 2 | 3 | 4 |
| d. Attrezzature fornitemi                     | 1               | 2 | 3 | 4 |
| e. Qualità dei dati raccolti                  | 1               | 2 | 3 | 4 |
| f. Guida dei coordinatori                     | 1               | 2 | 3 | 4 |
| g. Preparazione generale dei volontari        | 1               | 2 | 3 | 4 |
| h. Il contributo complessivo dei volontari    | 1               | 2 | 3 | 4 |
| i. Nuove conoscenze e contatti                | 1               | 2 | 3 | 4 |
| j. La disponibilità di nuove tecnologie       | 1               | 2 | 3 | 4 |
| k. L'uso delle tecnologie disponibili         | 1               | 2 | 3 | 4 |
| l. Fondi/finanziamenti disponibili            | 1               | 2 | 3 | 4 |
| m. Promozione tramite internet                | 1               | 2 | 3 | 4 |
| n. Attività di comunicazione in generale      | 1               | 2 | 3 | 4 |
| o. Comunicazioni ricevute durante le attività | 1               | 2 | 3 | 4 |
| p. Comunicazione dei risultati                | 1               | 2 | 3 | 4 |
| q. Qualità dell'esperienza                    | 1               | 2 | 3 | 4 |
| r. Successo generale                          | 1               | 2 | 3 | 4 |
| s. Premi ed incentivi ricevuti                | 1               | 2 | 3 | 4 |
| t. Contributo alla scienza                    | 1               | 2 | 3 | 4 |
| u. Altro (specifica):                         | 1               | 2 | 3 | 4 |

5. Indica le ragioni per cui hai partecipato, come subacqueo/a, nella Citizen Science:

|                                                 | D'accordo |   |   |
|-------------------------------------------------|-----------|---|---|
|                                                 | Neutro    |   |   |
| Non d'accordo                                   |           |   |   |
| a. Per la scienza                               | 1         | 2 | 3 |
| b. Perché mi interessava l'argomento            | 1         | 2 | 3 |
| c. Per la società e l'ambiente                  | 1         | 2 | 3 |
| d. Per il bene della medicina e della sicurezza | 1         | 2 | 3 |
| e. Per dare il mio contributo                   | 1         | 2 | 3 |
| f. Per la mia soddisfazione emotiva             | 1         | 2 | 3 |
| g. Per aumentare il mio livello di conoscenza   | 1         | 2 | 3 |
| h. Per il premio/incentivo                      | 1         | 2 | 3 |
| i. Per la mia soddisfazione personale           | 1         | 2 | 3 |
| j. Per il riconoscimento pubblico               | 1         | 2 | 3 |
| k. Per le collaborazioni e i contatti           | 1         | 2 | 3 |
| l. Per accedere a nuove tecnologie              | 1         | 2 | 3 |
| m. Per le generazioni future                    | 1         | 2 | 3 |
| n. Per passare tempo con persone come me        | 1         | 2 | 3 |
| o. Per acquisire nuove competenze               | 1         | 2 | 3 |
| p. Per stare con la famiglia e gli amici        | 1         | 2 | 3 |
| q. Altro (specifica):                           | 1         | 2 | 3 |

6. Hai intenzione di partecipare in futuro, come subacqueo/a, in attività di Citizen Science?

|    |    |
|----|----|
| Si | No |
|----|----|

6.1. Se la risposta è NO, puoi spiegarne il motivo?

---



---



---



---

7. Ci sono commenti che vuoi aggiungere sulla Citizen Science?

---



---



---



---

**SEZIONE D: ATTITUDINI VERSO LA CITIZEN SCIENCE****COSA È LA CITIZEN SCIENCE?**

La Citizen Science coinvolge volontari (non specializzati) in attività che prevedono la generazione di dati, (con osservazioni o campionamento) e/o l'analisi di questi stessi dati, a scopo scientifico.

1. Sei mai stato interessato, come subacqueo/a, alla Citizen Science?

|    |                                         |
|----|-----------------------------------------|
| SI | <b>Passa alle domande 1.1. and 1.2.</b> |
| NO | <b>Passa alla domanda 1.3.</b>          |

1.1. Quale tipo di Citizen Science ti interessa?

|                                   |   |
|-----------------------------------|---|
| Biologia, ecologia, conservazione | 1 |
| Medicina e sicurezza              | 2 |
| Tecnologia e ingegneria           | 3 |
| Scienze sociali                   | 4 |
| Altro (specifica):                | 5 |

|  |  |               |           |
|--|--|---------------|-----------|
|  |  |               | D'accordo |
|  |  |               | Neutro    |
|  |  | Non d'accordo |           |

**1.2. Perché ti interessa la Citizen Science?**

|                                                    |   |   |   |
|----------------------------------------------------|---|---|---|
| Mi interessa la scienza in generale                | 1 | 2 | 3 |
| Ha a che fare con gli argomenti che mi interessano | 1 | 2 | 3 |
| Contribuisce al bene della società e dell'ambiente | 1 | 2 | 3 |
| Contribuisce alla scienza                          | 1 | 2 | 3 |
| È un potente strumento scientifico                 | 1 | 2 | 3 |
| Avvicina i cittadini alla scienza                  | 1 | 2 | 3 |
| Fa crescere le persone                             | 1 | 2 | 3 |
| È educativa                                        | 1 | 2 | 3 |
| Incentiva i cittadini                              | 1 | 2 | 3 |
| Crea opportunità per stabilire nuovi contatti      | 1 | 2 | 3 |
| Dà accesso a nuove tecnologie                      | 1 | 2 | 3 |
| È un'occasione per socializzare                    | 1 | 2 | 3 |
| Mi hanno detto che ne vale la pena                 | 1 | 2 | 3 |
| Altro (specifica):                                 | 1 | 2 | 3 |

**1.3. Perché non ti interessa la Citizen Science?**

|                                                        |   |   |   |
|--------------------------------------------------------|---|---|---|
| Non ne so molto                                        | 1 | 2 | 3 |
| Non ho interesse nella scienza                         | 1 | 2 | 3 |
| Non tratta gli argomenti che mi interessano            | 1 | 2 | 3 |
| Non contribuisce alla scienza                          | 1 | 2 | 3 |
| Non contribuisce al bene della società e dell'ambiente | 1 | 2 | 3 |
| Non è uno strumento scientifico efficiente             | 1 | 2 | 3 |
| È una perdita di tempo                                 | 1 | 2 | 3 |
| È costosa                                              | 1 | 2 | 3 |
| Sfrutta i cittadini come volontari                     | 1 | 2 | 3 |
| Non è gratificante                                     | 1 | 2 | 3 |
| Non è organizzata bene                                 | 1 | 2 | 3 |
| Altri mi hanno detto che non ne vale la pena           | 1 | 2 | 3 |
| Non fa buon uso della tecnologia disponibile           | 1 | 2 | 3 |
| È discriminatoria verso chi non ha le competenze       | 1 | 2 | 3 |
| È noiosa                                               | 1 | 2 | 3 |
| Sembra difficile                                       | 1 | 2 | 3 |
| Se mi immergo lo faccio solo per divertirmi            | 1 | 2 | 3 |

|                                                      |   |   |   |
|------------------------------------------------------|---|---|---|
| Non mi fido degli organizzatori                      | 1 | 2 | 3 |
| Ho avuto una brutta esperienza a riguardo in passato | 1 | 2 | 3 |
| Altro (specifica):                                   | 1 | 2 | 3 |
|                                                      |   |   |   |

2. Saresti interessato, come subacqueo/a, a partecipare in attività di Citizen Science?

|    |                                         |
|----|-----------------------------------------|
| SI | <b>Passa alle domande 2.1. and 2.2.</b> |
| NO | <b>Passa alle domande 2.3. and 2.4.</b> |

|                                                              | D'accordo     |   |   |
|--------------------------------------------------------------|---------------|---|---|
|                                                              | Neutro        |   |   |
|                                                              | Non d'accordo |   |   |
| <b>2.1. Perché non hai mai partecipato prima?</b>            |               |   |   |
| Problemi di tempo                                            | 1             | 2 | 3 |
| Troppo giovane                                               | 1             | 2 | 3 |
| Conoscenza limitata della Citizen Science                    | 1             | 2 | 3 |
| Problemi logistici (e.g. trasporto)                          | 1             | 2 | 3 |
| Non mi è mai stato proposto                                  | 1             | 2 | 3 |
| Difficile trovare iniziative di Citizen Science              | 1             | 2 | 3 |
| Difficile iscriversi                                         | 1             | 2 | 3 |
| I progetti di solito si svolgono lontano da dove vivo        | 1             | 2 | 3 |
| Ci sono poche iniziative disponibili                         | 1             | 2 | 3 |
| Non mi sento di possedere le competenze necessarie           | 1             | 2 | 3 |
| Altri mi hanno detto che non ne vale la pena                 | 1             | 2 | 3 |
| Sembra complicata                                            | 1             | 2 | 3 |
| Utilizza una tecnologia obsoleta                             | 1             | 2 | 3 |
| Non ho/avevo denaro da spenderci                             | 1             | 2 | 3 |
| La mia attrezzatura non è adatta                             | 1             | 2 | 3 |
| Il sito del progetto che mi interessa è poco attraente       | 1             | 2 | 3 |
| Non c'erano programmi di formazione disponibili              | 1             | 2 | 3 |
| Il diving non mi ha dato la possibilità                      | 1             | 2 | 3 |
| Le informazioni non erano buone e/o erano in un'altra lingua | 1             | 2 | 3 |
| Altro (specifica):                                           | 1             | 2 | 3 |
| <b>2.2. Che cosa ti convincerebbe a partecipare?</b>         |               |   |   |
| Sono già convinto/a                                          | 1             | 2 | 3 |
| Che qualcuno venisse a parlarne                              | 1             | 2 | 3 |
| Aiuto logistico (es. trasporto)                              | 1             | 2 | 3 |
| Un incentivo in denaro                                       | 1             | 2 | 3 |
| Un incentivo come sconti o simile                            | 1             | 2 | 3 |
| Un corso di formazione                                       | 1             | 2 | 3 |
| Materiale informativo nella mia lingua                       | 1             | 2 | 3 |
| Una migliore copertura mediatica                             | 1             | 2 | 3 |
| Miglior disponibilità di iniziative di Citizen Science       | 1             | 2 | 3 |
| Migliore organizzazione                                      | 1             | 2 | 3 |
| Tecnologie migliori o nuove                                  | 1             | 2 | 3 |
| Che il diving mi desse la possibilità di partecipare         | 1             | 2 | 3 |
| Un sito web migliore                                         | 1             | 2 | 3 |
| Che mi si desse l'attrezzatura necessaria a partecipare      | 1             | 2 | 3 |
| Avere maggiore disponibilità economica                       | 1             | 2 | 3 |
| Altro (specifica):                                           | 1             | 2 | 3 |
| <b>2.3. Perché non ti interesserebbe partecipare?</b>        |               |   |   |
| Per gli stessi motivi della domanda 1.3                      | 1             | 2 | 3 |
| Non ho tempo                                                 | 1             | 2 | 3 |

|                                                         |   |   |   |
|---------------------------------------------------------|---|---|---|
| Sono troppo giovane/troppo vecchio/a                    | 1 | 2 | 3 |
| Ho problemi logistici (es. trasporto)                   | 1 | 2 | 3 |
| Sembra difficile                                        | 1 | 2 | 3 |
| I progetti disponibili si svolgono lontano da dove vivo | 1 | 2 | 3 |
| Non penso di possedere le competenze necessarie         | 1 | 2 | 3 |
| Non ne tratto benefici                                  | 1 | 2 | 3 |
| Guadagno troppo poco                                    | 1 | 2 | 3 |
| Altro (specifica):                                      | 1 | 2 | 3 |

#### 2.4. Cosa ti convincerebbe ad interessarti?

|                                                        |   |   |   |
|--------------------------------------------------------|---|---|---|
| Nulla                                                  | 1 | 2 | 3 |
| Che qualcuno me ne parlasse                            | 1 | 2 | 3 |
| Aiuto logistico (es. trasporto)                        | 1 | 2 | 3 |
| Un incentivo in denaro                                 | 1 | 2 | 3 |
| Un incentivo come sconti o altro                       | 1 | 2 | 3 |
| Un corso di formazione                                 | 1 | 2 | 3 |
| Materiale informativo nella mia lingua                 | 1 | 2 | 3 |
| Una migliore copertura mediatica                       | 1 | 2 | 3 |
| Miglior disponibilità di iniziative di Citizen Science | 1 | 2 | 3 |
| Migliore organizzazione                                | 1 | 2 | 3 |
| Tecnologie migliori o nuove                            | 1 | 2 | 3 |
| Un bel sito web                                        | 1 | 2 | 3 |
| Che il diving mi invitasse a partecipare               | 1 | 2 | 3 |
| Che mi venisse fornita l'attrezzatura necessaria       | 1 | 2 | 3 |
| Avere maggiore disponibilità economica                 | 1 | 2 | 3 |
| Altro (specifica):                                     | 1 | 2 | 3 |

#### 3. Vuoi aggiungere altro?

---



---



---

Grazie! © Green Bubbles 2015 [www.greenbubbles.eu](http://www.greenbubbles.eu)

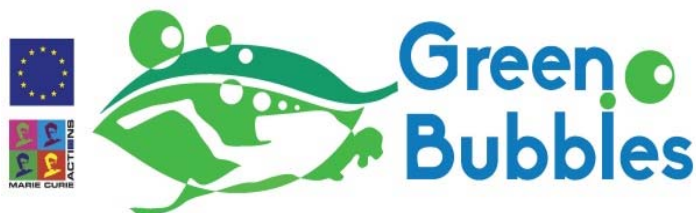

Il progetto Green Bubbles ha ricevuto un finanziamento dal programma di ricerca e innovazione dell'Unione Europea Horizon 2020, attraverso il contratto Marie Skłodowska-Curie n 643712. Questo documento riflette esclusivamente le opinioni degli autori. La Executive Research Agency non è responsabile per l'uso che può essere fatto delle informazioni in esso contenute.
